## 1 **Wnt- and Glutamate-receptors orchestrate stem cell dynamics and asymmetric cell** 2 **division**

3  
4 Sergi Junyent<sup>\*,1</sup>, Joshua Reeves<sup>\*,1</sup>, James L. A. Szczerkowski<sup>1</sup>, Clare L. Garcin<sup>1</sup>, Tung-Jui  
5 Trieu<sup>1</sup>, Matthew Wilson<sup>1</sup> and Shukry J. Habib<sup>#,1</sup>

6  
7 \*These authors contributed equally

8 #Correspondence to: [shukry.habib@kcl.ac.uk](mailto:shukry.habib@kcl.ac.uk)

9 <sup>1</sup>Centre for Stem Cells and Regenerative Medicine, King's College London. 28<sup>th</sup> Floor, Tower  
10 Wing, Guy's Campus, Great Maze Pond, SE1 9RT. London, United Kingdom.

### 11 12 13 **ABSTRACT**

14 Wnt signalling regulates many aspects of cell biology. Wnt-pathway activation and its  
15 downstream effects have been extensively studied, but the dynamic analysis of Wnt-ligands  
16 on mammalian cellular membranes is obstructed by difficulties of visualization. We  
17 overcome this using microbead-tethered Wnts presented to single embryonic stem cells,  
18 which undergo Wnt-mediated asymmetric cell division (ACD). Through live imaging and  
19 genetic editing, we show that knockout of Wnt co-receptor Lrp5 promotes cytoneme  
20 formation and Wnt-recruitment, which requires Lrp6 and  $\beta$ -catenin. Lrp5 facilitates ligand-  
21 retention at the membrane, and alongside Lrp6 mediates Wnt-ligand stabilization and  
22 positioning.  $\beta$ -catenin or Wnt co-receptor knockout causes misorientation at mitosis, and all  
23 but Lrp5 are required for Wnt-orientated ACD. Surprisingly, ionotropic glutamate receptor  
24 (iGluR) activity enables initial Wnt-recruitment, positioning, and ultimately oriented ACD.  
25 Uniquely, we have scrutinized the early Wnt ligand-membrane interaction, linking roles of  
26 Wnt-pathway components and crosstalk with iGluRs in guiding cell fate determination by  
27 oriented ACD.

## 1 INTRODUCTION

2 Wnt signalling is an ancient pathway that accompanied the evolution of metazoans and  
3 plays major roles in cell biology, development, tissue homeostasis and disease (Clevers,  
4 2006; Garcin and Habib, 2017). This pathway is regulated by Wnt ligands, which are  
5 palmitoylated in the endoplasmic reticulum (Takada et al., 2006). The lipid moiety is crucial  
6 for Wnt secretion and renders the protein hydrophobic (Willert et al., 2003). Consequently,  
7 Wnts are often secreted locally by producing cells (Langton et al., 2016; Mills et al., 2017).  
8 Wnt ligand binding to the receptor Frizzled (Fzd) and the co-receptors Low-density  
9 lipoprotein receptor-related protein 5 and 6 (Lrp5 and Lrp6) leads to the initiation of a  
10 signalling cascade that results in the stabilization of  $\beta$ -catenin, its nuclear translocation and  
11 the transcription of Wnt/ $\beta$ -catenin target genes (Nusse and Clevers, 2017).

12 Concomitantly, Wnt signalling can control the morpho-kinetics of the receiving cells, often  
13 involving a crosstalk with  $\beta$ -catenin independent signalling cascades (James et al., 2008;  
14 Komiya and Habas, 2008). As a result, Wnt reception can initiate a complex signalling  
15 program that coordinates cell cycle progression (Niehrs and Acebron, 2012), cytoskeleton  
16 arrangement (Salinas, 2007; Stamatakou et al., 2015), cell migration (Sedgwick and  
17 D'Souza-Schorey, 2016) and cell polarization (Goldstein et al., 2006; Stanganello et al.,  
18 2019). In stem cells, localized Wnt activity controls cell fate by inducing self-renewal and  
19 blocking differentiation (Clevers et al., 2014; Garcin and Habib, 2017).

20 Components of the Wnt signalling pathway modulate many aspects of the mitotic program,  
21 including microtubule dynamics, spindle formation and centrosome division (Niehrs and  
22 Acebron, 2012). Lrp6 is phosphorylated at G2-M, which enhances Wnt signalling in a cell  
23 cycle-dependent manner (Davidson et al., 2009), and Fzd and Lrp6 establish spindle  
24 orientation and promote mitotic progression in HeLaS3 cell line (Kikuchi et al., 2010).  $\beta$ -  
25 catenin accumulates at the centrosomes, and regulates radial microtubules and centrosome  
26 splitting (Bahmanyar et al., 2008; Huang et al., 2007). These reports and others (Akong et  
27 al., 2002; Bienz, 2005; Hendriksen et al., 2008; McCartney et al., 1999; Mizumoto and Sawa,  
28 2007; Tahinci et al., 2007) suggest a role for the intrinsic Wnt pathway components in the  
29 regulation of cell polarization and cell division. *In vivo* studies in non-mammalian systems (*C.*  
30 *elegans*, *Drosophila* and *Xenopus*) have also demonstrated that localized Wnt reception  
31 influences cell fate by inducing oriented asymmetric cell division (ACD) (Bertrand, 2016;  
32 Goldstein et al., 2006; Huang and Niehrs, 2014; Kaur et al., 2020; Sugioka et al., 2011;  
33 Walston et al., 2004).

34 In these systems, the coordinated effects of Wnt activation arise from the interaction  
35 between localized Wnt ligands and Wnt pathway components at the cell membrane.

1 However, our understanding of localized Wnt recognition in mammalian cells remains  
2 elusive. Insights into Wnt ligand-receptor interaction so far has been restricted to genetic  
3 and/or biochemical analysis, or transcription of target genes (Mills et al., 2017). *In vitro*  
4 studies have often relied on the addition of solubilized Wnt ligands to the media, which does  
5 not recapitulate the localized presentation of Wnt often observed *in vivo* (Garcin and Habib,  
6 2017; Mills et al., 2017). Moreover, direct tagging and visualization of mammalian Wnt  
7 proteins has proven difficult (Willert and Nusse, 2012), which complicates the study of the  
8 effects of Wnt at the single cell level. As a result, the molecular events that control Wnt  
9 reception and kinetics in the cell remain elusive.

10 To overcome these issues, we previously developed a system of localized Wnt presentation  
11 to study Wnt response at the single cell level. We covalently immobilized biologically active  
12 Wnt ligands to microbeads, generating a source of localized Wnt (a Wnt-bead) that can be  
13 visualized by light microscopy and tracked over time (Habib et al., 2013; Lowndes et al.,  
14 2017). We employed this approach to study the effect of localized Wnt signals on stem cells.

15 Embryonic stem cells (ESCs) are a powerful tool to investigate cell fate. ESCs are Wnt  
16 responsive (ten Berge et al., 2011) and can be seeded as single cells and retain the capacity  
17 to self-renew and differentiate to all lineages of the adult body (Martello and Smith, 2014).  
18 Additionally, recent data reveals that in ESCs, Wnt reception and the subsequent activation  
19 of the Wnt/ $\beta$ -catenin pathway act independently of receptor internalization (Rim et al., 2020).  
20 By combining the Wnt-beads with live cell imaging at high temporal resolution we observed  
21 that ESCs generate specialized membrane protrusions, termed cytonemes, that recruit  
22 localized Wnt signals. This recruitment is mediated by a crosstalk between Lrp6 and  
23 ionotropic glutamate receptor (iGluR) activity (Junyent et al., 2020). Wnt-bead recruitment  
24 initiates a polarization event involving components of the Wnt/ $\beta$ -catenin pathway, orients the  
25 mitotic spindle and leads to ACD (Habib et al., 2013; Junyent et al., 2020). This results in a  
26 Wnt-bead proximal cell that maintains high levels of pluripotency markers (e.g. Nanog,  
27 Rex1), and a Wnt-bead distal cell that progresses to a more differentiated cell fate (Habib et  
28 al., 2013). However, the molecular mechanisms underpinning this process also remained  
29 understudied.

30 Here, we combine Wnt-beads with genetic editing of ESCs to investigate the kinetics of Wnt  
31 reception. We interrogate how intrinsic components of the Wnt pathway control the cellular  
32 response to localized Wnts that leads to ACD. We used ESCs knock-out (KO) for the Wnt  
33 co-receptors Lrp5, Lrp6 and a double Lrp5/6 KO to dissect the role of the early reception  
34 complex in Wnt ligand interaction and response (Junyent et al., 2020). We also studied an  
35 inducible  $\beta$ -catenin KO ESC line that enables rapid ablation of protein without long term

1 compensation effects (Raggioli et al., 2014) to investigate the role of the downstream  
2 effector of the Wnt/ $\beta$ -catenin pathway. Moreover, we pharmacologically inhibit the activity of  
3 iGluRs to examine how crosstalk between Wnt reception and iGluRs modify the cell  
4 response to localized Wnt signals beyond initial ligand recognition.

5 Our time-series analysis resolves the dynamics of Wnt ligand recruitment by single ESCs  
6 into three stages: initial cytoneme-mediated interaction, early Wnt interaction with the cell  
7 membrane, and the subsequent effects of the Wnt-bead recruitment on spindle orientation  
8 and cell fate choice. We show that Lrp6, iGluR activity and  $\beta$ -catenin are required for the  
9 recruitment of the Wnt beads to the cell. On the other hand, KO of Lrp5 promotes cytoneme  
10 generation and facilitates Wnt-bead recruitment. Co-receptor or  $\beta$ -catenin KO, or inhibition of  
11 iGluR, restricts Wnt-bead position to the periphery of the cell. KO of Lrp5 or Lrp6 leads to  
12 increased Wnt bead movement, and ESCs lacking Lrp5 maintain Wnt-bead contact for  
13 shorter times. Upon progression to mitosis, co-receptor or  $\beta$ -catenin KO, or iGluR inhibition,  
14 impairs spindle orientation. Only Lrp5KO ESCs retain the capacity to asymmetrically partition  
15 pluripotency markers between daughter cells.

16 Altogether, our data explores how Wnt receptors,  $\beta$ -catenin and the activity of iGluRs  
17 orchestrate the dynamics of a stem cell interaction with localized Wnt signals, and how these  
18 components subsequently regulate asymmetric cell division.

19

## 1 RESULTS

### 2 The Wnt co-receptor Lrp6 regulates the prevalence and rate of cytoneme formation of 3 ESCs

4 We aimed to investigate how components of the Wnt/ $\beta$ -catenin pathway affect the cellular  
5 dynamics of ESCs and their capacity to respond to Wnt ligands. To do so, we used our  
6 previously published knock-out (KO) ESC lines. We KO the co-receptors of the Wnt/ $\beta$ -  
7 catenin pathway Lrp5 (Lrp5KO), Lrp6 (Lrp6KO) and generated a double KO of both Lrp5 and  
8 6 (Lrp5/6dKO) in mouse embryonic stem cells (ESCs), as previously described (Junyent et  
9 al., 2020) (**Fig. 1A**). We also utilized an ESC line with a conditional KO of the effector of the  
10 pathway,  $\beta$ -catenin ( $\beta$ KO), which was generated as previously described (Junyent et al.,  
11 2020; Raggioli et al., 2014). In this line, complete  $\beta$ -catenin depletion is achieved after 3-day  
12 induction with 4-hydroxytamoxifen (4-HT).

13 We validated the response of the KO cell lines to exogenous Wnt3a ligands. We used cell  
14 lines harbouring a reporter of the transcriptional co-activator activity of  $\beta$ -catenin, which  
15 express eGFP upon  $\beta$ -catenin-Tcf/Lef binding its 7xTCF promoter (Fuerer and Nusse, 2010)  
16 (**Fig. 1B**). In the presence of purified Wnt3a ligands and serum containing media, 49.06% of  
17 wild-type (WT) cells express eGFP (**Fig. 1B and C**). In the absence of Wnt3a, only a basal  
18 level of pathway activation is observed. Lrp5KO ESCs, when stimulated with Wnt3a, have a  
19 significant reduction in activation of the Wnt/ $\beta$ -catenin pathway in comparison to WT ESCs  
20 (26.96% eGFP<sup>+</sup> cells). In Lrp6KO ESCs, pathway activation is further compromised (5.60%  
21 eGFP<sup>+</sup> cells). Lrp5/6dKO ESCs cannot activate the Wnt/ $\beta$ -catenin pathway at all by soluble  
22 Wnt3a stimulation.  $\beta$ KO, which lacks  $\beta$ -catenin expression, also does not activate the  
23 pathway during Wnt3a stimulation.

24 To facilitate expansion of the cell lines, we cultured cells in 2i media (CHIR 99021,  
25 PD0325901) that maintains ESC self-renewal without the requirement for Wnt ligands or  
26 Wnt-receptor activity (Ying et al., 2008). Under these conditions, receptor KO ESCs maintain  
27 levels of pluripotency markers comparable to those of WT cells. The conditional  $\beta$ -catenin  
28 KO cell line has reduced levels of pluripotency markers after 3-day induction with 4-HT,  
29 compared to the WT cells (Junyent et al., 2020). In all performed experiments, cell lines  
30 were seeded as single cells at low density in a serum-containing media without 2i.

31 ESCs utilize cytonemes to recruit Wnt ligands immobilized to a microbead (Wnt3a-beads)  
32 (Junyent et al., 2020). We have previously reported (Junyent et al., 2020) that at the single  
33 cell level, WT ESCs produce an average of 5 cytonemes that extend to an average  
34 maximum length of 29.9  $\mu$ m (also depicted in **Fig. 1D, Movie 1**). The KO ESC lines exhibit  
35 variability in the average number of cytonemes per cell, between 4 for co-receptor KOs

1 **(Movie 2-4)** and 7 for  $\beta$ KO (**Movie 5**). Cytosome length is shorter in KO ESCs than in WT  
2 cells, with an average maximum length of 16.3 - 23.0  $\mu\text{m}$  for coreceptor KOs, and  $\sim$ 20.0 for  
3  $\beta$ KO (**Fig 1D**). Regardless of differences in cytosome characteristics, all ESC lines studied  
4 use cytosomes in a similar way to facilitate interaction with the surrounding environment  
5 (Junyent et al., 2020).

6 To investigate whether KO of Wnt/ $\beta$ -catenin pathway components affects the dynamics of  
7 cytosome formation in ESCs, live imaging was performed. Single cells were seeded at low  
8 density and imaged for 12 hours. Measurement of the percentage of cells with cytosomes  
9 revealed that WT ESCs begin forming cytosomes upon substrate attachment. Within 4  
10 hours, over 40% of WT ESCs had cytosomes (**Fig. 1E**). Interestingly, more Lrp5KO ESCs  
11 generate cytosomes than WT ESCs, reaching 55.53% in 3 hours. The rate of increase in the  
12 percentage of cells with cytosomes is similar to WT in Lrp6KO and  $\beta$ KO, with the percentage  
13 of cells with cytosomes in Lrp5/6dKO cells being slightly reduced, and plateauing marginally,  
14 but significantly, lower at 31.83%.

15 Together with cytosome formation, cell motility provides a mechanism to encounter and  
16 interact with the local environment. To understand whether the observed changes in the  
17 cytosomes of the Wnt/ $\beta$ -catenin pathway KOs are coupled with changes to their movement,  
18 we tracked the position of the cell over time. The Mean Squared Displacement (MSD), the  
19 measure of the average cell movement per minute, revealed that cell motility in WT ESCs is  
20 minimal, with an average MSD of 1.16  $\mu\text{m}^2/\text{min}$  (**Fig. 1F**). No significant differences to WT  
21 were observed between receptor or  $\beta$ -catenin KO ESCs, with the average MSD values for  
22 each cell type falling between 0.97 and 1.49  $\mu\text{m}^2/\text{min}$ .

23 Altogether, we observed that intrinsic Wnt/ $\beta$ -catenin components control the generation of  
24 cytosomes, without affecting overall cellular motility. Since ESCs use cytosomes to recruit  
25 localized Wnt signals, we aimed to further investigate how different components of the  
26 Wnt/ $\beta$ -catenin pathway affect the recruitment of Wnt3a-beads to the cell membrane.

## 27 **Wnt co-receptors and iGluR activity orchestrate the interaction dynamics between** 28 **localized Wnt3a and the ESC membrane**

29 To examine the effect of Wnt/ $\beta$ -catenin pathway KOs on the capacity of ESCs to recruit  
30 localized Wnt signals, we seeded cells at low density and presented them with dispersed  
31 Wnt3a-beads. In some conditions, cells were presented with inactivated Wnt3a-beads  
32 (iWnt3a-beads), which are dithiothreitol (DTT)-treated to denature the Wnt3a protein while  
33 covalently bound to the bead. Cells were live-imaged each minute for a total of 12 hours.

1 We aimed to quantify the role of the co-receptors and  $\beta$ -catenin in the dynamics of the  
2 recruitment of localized Wnt3a to ESCs, integrating analysis at both the population and  
3 single cell level. This allowed us to quantify the capability of ESCs to form and maintain  
4 stable interactions with a source of localized Wnt3a, which can impact downstream cellular  
5 responses. To do so, we combined two measurements: Firstly, the proportion of cells which  
6 were in contact with a Wnt3a-bead over time was measured every hour from the start of the  
7 imaging for 12 hours (**Fig. 2A and B**). Secondly, contact between ESC and Wnt3a-bead was  
8 measured by the duration of a single cell-bead interaction (**Fig. 2A, C and D**).

9 At the population level, when WT cells were presented with Wnt3a-beads, the proportion of  
10 cells with beads increased linearly in the first 4 hours, rising from 20.68% at the beginning of  
11 the video to 56.73%, before rising more slowly to 66.75% after 12 hours (**Fig. 2B**). ESC  
12 cytonemes are ligand-selective and can efficiently recruit localized Wnt3a signals but not  
13 iWnt3a-beads (Junyent et al., 2020). Indeed, when WT ESCs are presented with iWnt3a-  
14 beads, the percentage of cells with beads does not rise and remains less than 20% for most  
15 of the time period (**Fig. 2B**). In terms of duration of interaction with the localized Wnt3a  
16 source, WT cells were found to retain Wnt3a-beads for over 380 minutes, on average. Many  
17 cells retained Wnt3a-beads until the end of the video (12 hours, **Fig. 2C-D**). iWnt3a-beads,  
18 however, are retained for a significantly shorter time (**Fig. 2D**). In this condition, iWnt3a-  
19 beads are often dropped after a shorter period (<60 minutes), showing as a more  
20 'fragmented' plot (**Fig. 2C**).

21 ESCs lacking Lrp6 (Lrp6KO, Lrp5/6dKO) were impaired for Wnt3a-bead accumulation,  
22 similar to WT cells with iWnt3a-beads (**Fig. 2B**). The proportion of cells with beads does not  
23 rise, remaining at approximately 30% over the course of 12 hours (**Fig. 2B**). Lrp5KO cells  
24 retain the ability to accumulate Wnt3a-beads, reaching 55.86% after 5 hours (**Fig. 2B**). Cells  
25 lacking Lrp5 (Lrp5KO, Lrp5/6dKO) maintained contact with Wnt3a-beads for a significantly  
26 shorter time, frequently losing contact after 200 minutes. The contact duration of Lrp6KO  
27 cells with Wnt3a-beads was not significantly different to WT (**Fig. 2D**).

28  $\beta$ -catenin ablation does not affect the reactivity of ESCs to a source of localized Wnt3a,  
29 when presented at a similar distance to WT cells (Junyent et al., 2020). However, similarly to  
30 Lrp6KO, cells lacking  $\beta$ -catenin ( $\beta$ KO) had significantly impaired Wnt3a-bead accumulation  
31 (**Fig. 2B**). Duration of localized Wnt3a contact, however, was not significantly different than  
32 WT (**Fig. 2C and D**).

33 A crosstalk between Lrp6 and the activity of AMPA/Kainate glutamate receptors (iGluRs)  
34 regulates the reactivity of ESC cytonemes to Wnt3a beads (Junyent et al., 2020). Here we  
35 show that pharmacological inhibition of iGluRs by cyanquixaline (CNQX) in WT ESCs did not

1 affect the rate of cytoneme formation or the cell movement (**Fig. 1E and F**). However, the  
2 percentage of cells with beads was significantly lower during CNQX inhibition than untreated  
3 WT ESCs, despite similar retention time of the Wnt3a-bead (**Fig. 2B-D**).

4 Differences in the retention time and proportion of cells with Wnt3a-beads between Lrp5KO  
5 and Lrp6KO demonstrates that components of the Wnt/ $\beta$ -catenin pathway have different  
6 roles in the overall process of signal reception. Further, the differing effects of receptor or  
7 effector KOs show that stable signal recruitment is a combination of several cell-signal  
8 processes. While Lrp6,  $\beta$ -catenin, and activity of iGluRs are required for the efficient uptake  
9 and accumulation of Wnt3a-beads, Lrp5 regulates the stability of the interaction.

10 Despite these differences, it is important to note that cells of all types and in all conditions do  
11 uptake Wnt3a-beads, allowing further analysis of the interaction with localized Wnt3a. As the  
12 recruitment is the first stage of many in the process of signal reception, we aimed to  
13 investigate the dynamics of the cell-bead contact during this interaction.

#### 14 **Lrp5 and Lrp6 have important but distinct roles in the positioning and stabilization of** 15 **Wnt3a ligands on the ESC membrane**

16 The Wnt3a-bead approach provides a unique opportunity to visualize and explore the  
17 dynamics of localized Wnt on the cell membrane. Therefore, we next studied the interaction  
18 between Wnt and cells after the initial Wnt3a-bead recruitment. To do so, we measured the  
19 Wnt-bead position at every minute after initial Wnt-bead recruitment, for 3 hours. To quantify  
20 the dynamics and location of Wnt3a-bead on the ESC membrane, we measured the  
21 distance between Wnt-bead and the cell centre, and we reported it as a proportion of the cell  
22 radius (**Fig. 3A**).

23 Cells recruit Wnt-beads to the cell membrane via cytonemes, where they initially reside in  
24 the periphery. WT ESCs rapidly pull the active Wnt3a-beads from the tip of the cytoneme,  
25 first to the periphery (between 0.7 and 1.0 of the cell radius), then closer in the cell body  
26 (between 0.3 and 0.7 of the cell radius). Within 1 hour, the Wnt3a-beads on average were  
27 between 0.5 and 0.6 of the cell radius, indicating close contact with the central portion of the  
28 cell body (**Fig. 3A-C**). iWnt3a-beads are recruited by WT ESCs less frequently (**Fig. 2B**)  
29 (Junyent et al., 2020). If recruited, iWnt3a-beads are also initially moved from the cytoneme  
30 tip to the periphery (0.7 to 1.0 of the cell radius). However, iWnt3a-beads are not positioned  
31 further within the cell body, reaching at closest 0.7 of the cell radius, on average (**Fig. 3A-C**).

32 ESCs lacking Lrp6 (Lrp6KO, Lrp5/6dKO) are likewise, on average, unable to recruit the  
33 Wnt3a-bead closer to the cell body (**Fig. 3B-C**). After approximately 150 minutes Lrp5KO  
34 ESCs are able to position the bead to within 0.6 of the cell radius, however this remains



1 significantly impaired when compared to the WT cells. ESCs lacking  $\beta$ -catenin, or WT ESCs  
2 during CNQX inhibition, are also unable to maintain the bead closer than 0.7 of the cell  
3 radius (**Fig. 3B-C**).

4 KO of the receptors of the Wnt/ $\beta$ -catenin pathway, ablation of  $\beta$ -catenin, or inhibition of  
5 iGluR activity results in the significantly impaired prolonged positioning of a source of  
6 localized Wnt3a after recruitment by ESC cytoneme. Our data demonstrates differences in  
7 the positioning of the Wnt3a-bead relative to the cell, however the dynamics of the Wnt3a-  
8 cell interaction are also defined by the motion of the Wnt3a-bead relative to the cell. This led  
9 us to investigate the movement of the bead on the membrane. We calculated the MSD of the  
10 bead relative to the centre of the nucleus, for each frame of the same sequence of images  
11 as the bead position measurements (**Fig. 3D**).

12 Our analysis indicates that iWnt3a-beads held by WT ESCs have a higher rate of movement  
13 than Wnt3a-beads, with an average MSD of  $5.09 \mu\text{m}^2/\text{min}$ , compared to  $3.33 \mu\text{m}^2/\text{min}$  for  
14 Wnt3a-beads (**Fig. 3E**). The Wnt3a-beads on ESCs lacking Lrp5 (Lrp5KO), Lrp6 (Lrp6KO)  
15 or the Lrp5/6dKO have a MSD significantly higher, at  $4.76 \mu\text{m}^2/\text{min}$ ,  $4.89 \mu\text{m}^2/\text{min}$  and  $4.54$   
16  $\mu\text{m}^2/\text{min}$ , respectively. ESCs with  $\beta$ KO or CNQX inhibition have a similar rate of Wnt3a-bead  
17 movement to that of the WT control (**Fig. 3E**).

18 Altogether, our results show that WT ESCs recruit and retain Wnt3a-beads, where they are  
19 positioned further from the periphery of the cell, with limited movement. However, WT ESCs  
20 do not recruit iWnt3a-beads efficiently and have unstable interactions. ESCs position  
21 iWnt3a-beads in the periphery of the cell, where they also have more movement, and cell-  
22 bead contact is lost after a shorter on average interaction. Perturbation of the pathway  
23 components, or iGluR activity, results in impaired ability to position Wnt3a-beads close to the  
24 centre of the cell. Furthermore, while Lrp6,  $\beta$ -catenin and iGluR activity are required for the  
25 efficient recruitment of Wnt3a-beads, Lrp5 is important for retention and maintenance of the  
26 Wnt3a-bead contact.

27 We analysed the dynamics of Wnt3a-bead on the ESC membrane, and what role the  
28 pathway components have during this interaction. It is known that a Wnt3a-bead promotes  
29 orientated asymmetric cell division (ACD) in mouse ESCs (Habib et al., 2013). In order to  
30 follow the effect of bead dynamics through the process of cellular division, we studied the  
31 orientation of the spindle during mitosis.

32 **Wnt/ $\beta$ -catenin pathway and iGluR activity regulate the orientation of the mitotic**  
33 **spindle**

1 Wnt-mediated spindle orientation is known as an important factor in the process of ACD in  
2 several biological systems (Bertrand, 2016; Goldstein et al., 2006; Huang and Niehrs, 2014;  
3 Kaur et al., 2020; Sugioka et al., 2011; Walston et al., 2004). Spindle orientation is  
4 established and can be determined as early as the anaphase (Kiyomitsu and Cheeseman,  
5 2013). Our high temporal resolution of live imaging every one minute allows accurate  
6 measurement at this time point. Anaphase can be clearly identified in brightfield by  
7 elongation of the cell along the axis of mitosis and separation of chromosomes (**Fig. 4A**).  
8 Precise measurement of the direction of Wnt3a signal is achieved by direct visualization of  
9 the Wnt3a-bead. The angle between the bead, the centre of the dividing cell, and the minor  
10 axis was measured (**Fig. 4B**,  $\alpha$ ). In this way, 90 degrees represents the spindle aligned  
11 directly towards the Wnt3a-bead. 0 degrees represents the spindle aligned orthogonal to the  
12 bead, a misoriented division (**Fig. 4B**).

13 WT ESCs divide predominantly oriented towards the Wnt3a-bead, with a most common  
14 angle of 85-90 degrees (**Fig. 4C**). This biased distribution is significantly different ( $p < 0.05$ )  
15 to a randomized distribution by Chi-square statistical analysis (**Fig. 4I**). This analysis  
16 compares the experimental distribution of division angles to a randomized distribution of  
17 spindle orientations. The randomized distribution (in which the Wnt-bead contact is not  
18 having an effect) assumes a non-biased accumulation of division counts at  $0^{\circ}$ - $30^{\circ}$ ,  $30^{\circ}$ - $60^{\circ}$   
19 and  $60^{\circ}$ - $90^{\circ}$  as 1/3:1/3:1/3 of the total divisions. Indeed, when presented with iWnt3a-beads,  
20 the bias towards the bead is not seen, producing a randomized distribution. An increased  
21 proportion of cells has iWnt3a-beads between 0 and 5 degrees (**Fig. 4C and I**).

22 Single ESCs that lack Lrp5,  $\beta$ -catenin, or iGluR activity, and divide with Wnt3a-beads, result  
23 in a similarly randomized distribution ( $p > 0.05$ , Chi-square analysis), indicating a loss of  
24 Wnt-mediated spindle orientation (**Fig. 4D, G-I**). In ESCs lacking Lrp6 (Lrp6KO and  
25 Lrp5/6dKO) division contacting a Wnt3a-bead results in a misaligned orientation. Here, the  
26 distribution is significantly different from randomized distribution ( $p < 0.05$ , Chi-Square  
27 statistical analysis, **Fig. 4I**). However, the experimental angle distributions of Lrp6KO and  
28 Lrp5/6dKO are significantly different to the one measured in WT ESCs dividing with a  
29 Wnt3a-bead. This is measured by two-sample Kolmogorov-Smirnov (K-S) statistical  
30 analysis, which identifies whether two data samples arise from the same distribution  
31 (assuming non-normality). In Lrp6KO, divisions are oriented mostly between 0 and 40  
32 degrees, and in Lrp5/6dKO, the divisions are mostly between 0 and 30 degrees (**Fig. 4E-F**).  
33 While they retain some capability to align the spindle beyond a randomized orientation,  
34 neither represent efficient Wnt3a-orientated divisions. By K-S statistical analysis, all  
35 conditions, whether by inactive iWnt3a-beads, component KO, or CNQX inhibition, are

1 significantly different from the Wnt3a-orientated spindle seen in WT ESCs with Wnt3a-beads  
2 **(Fig. 4I)**.

3 Disruption of the Wnt co-receptors, the downstream component  $\beta$ -catenin, and iGluR activity  
4 impairs the orientation of the spindle towards a source of localized Wnt3a during division.  
5 While localized Wnt3a controls spindle orientation, it also controls cell fate, producing a self-  
6 renewed Wnt3a-proximal ESC and a Wnt3a-distal prone cell to differentiation. Next we  
7 studied if the Wnt3a-spindle orientation is coupled to the cell fate determination.

### 8 **iGluR activity is required for asymmetric division of pluripotency markers, while Lrp5** 9 **is dispensable**

10 Asymmetric cell division (ACD) is the partitioning or enrichment of cellular components in  
11 one of the two daughter cells deriving from mitosis that leads to differences in the cell fate of  
12 daughter cells. We studied the role of Wnt co-receptors and  $\beta$ -catenin as well iGluR activity  
13 in this process.

14 To that end, we quantified the distribution of the pluripotency markers in post-division pairs  
15 of daughter cells in contact with Wnt3a-beads. Wnt3a-beads induces ACD in single ESCs  
16 (Habib et al., 2013). Expression of pluripotency markers allows comparison of the cell fate of  
17 the daughter cells. A higher pluripotency marker expression indicates maintenance of a  
18 naïve ESC, whereas a lower expression indicates a shift towards a more differentiated state.  
19 We seeded single cells at low density in the presence of Wnt3a-beads for 6 hours, found to  
20 be optimal for capturing cell pairs immediately after division. We then fixed, stained and  
21 analysed the divided cells, where a bead is in clear contact with only one of the two daughter  
22 cells, ensuring that cell pairs with an asymmetric presentation of the Wnt3a signal are  
23 analysed.

24 Cell pairs were categorized based on the distribution of pluripotency markers Rex1 and  
25 Nanog **(Fig. 5A and B)**. If the cell in contact with the bead (Wnt3a-proximal) contains higher  
26 pluripotency marker signal, this indicates that the cell nearest the bead has self-renewed.  
27 Correspondingly, the Wnt3a-distal cell expresses significantly less pluripotency marker. This  
28 is named a 'Proximal' distribution. The corollary, where the farthest cell expresses more  
29 pluripotency marker is named a 'Distal' distribution. An even distribution, with no significant  
30 bias to either cell is named 'Distributed'. Only the proximal condition represents a Wnt-  
31 orientated asymmetric cell division.

32 When presented with Wnt3a-beads, a large proportion of wild type ESC doublets are  
33 proximally distributed, and have therefore undergone Wnt-oriented ACD **(Fig. 5C and D)**.  
34 Lrp5 KO ESCs lose the ability to align the spindle towards a Wnt3a signal **(Fig. 4D)**.

1 However, in Lrp5 KO ESCs that have achieved a Wnt3a-oriented division and solely one cell  
2 maintains contact with the Wnt3a-bead, they retain the capability for Wnt3a-oriented ACD  
3 (**Fig. 5C-F**). This Wnt3a-oriented ACD is no longer favoured during CNQX inhibition. While a  
4 total of ~60% of cell doublets have undergone ACD when treated with CNQX, only ~30% of  
5 total doublets have a pluripotency marker distribution proximal to the localized Wnt3a (**Fig.**  
6 **5C-F**).

7 ESCs lacking Lrp6 or  $\beta$ -catenin (Lrp6KO, Lrp5/6dKO,  $\beta$ KO) results in an impairment of ACD  
8 in any orientation (Proximal or Distal). This suggests that these cells are unable to  
9 compartmentalize protein constituents. The majority (49.11% to 76.16%) of these cell pairs  
10 have equal pluripotency marker expression in both daughter cells. This is observed in the  
11 expression of both Rex1 and Nanog (**Fig. 5C-F**).

12 In summary, in ESCs Lrp5 has a role in the maintenance of contact with a localized Wnt3a  
13 source, and spindle orientation towards the Wnt3a signal. In the few Lrp5KO ESCs that do  
14 divide towards a Wnt3a-bead, Wnt3a-oriented ACD is achieved with similar efficiency to WT.  
15 Both Lrp5 and Lrp6 are involved in the stabilization of the position of Wnt3a-cell contact.  
16 Lrp6, however, plays a larger role in forming the asymmetric distribution of protein  
17 components at division, alongside  $\beta$ -catenin. Lrp6KO in ESCs results in severely impaired  
18 activation of the Wnt/ $\beta$ -catenin pathway, as well as impaired recruitment and stabilisation of  
19 interaction with Wnt3a-beads. Prior to ACD,  $\beta$ -catenin also has roles in Wnt3a recruitment  
20 and orientation of the spindle. iGluR activity functions parallel those of Lrp6 in terms of  
21 Wnt3a recruitment and the breaking of cellular symmetry.

22 We have elucidated the processes and dynamics that link initial signal interaction to the  
23 asymmetric cell division that determines differences in cell fate within a pair of daughter  
24 cells. We have determined that co-receptors of the Wnt/ $\beta$ -catenin pathway have differing  
25 roles during interaction with a localized source of Wnt3a on the cell membrane. Furthermore,  
26 we show that iGluR activity remains coupled to components of the Wnt/ $\beta$ -catenin pathway in  
27 the downstream effects of spindle orientation and ACD. This suggests that crosstalk  
28 between AMPA/Kainate receptor signalling and Lrp6 activation is not only involved in signal  
29 recognition and response, as previously shown, but is coupled throughout the spatial  
30 organisation and specification of dividing ESCs by Wnt3a.

31

32

## 1 DISCUSSION

2 Cell fate and spatial positioning occur in concert to achieve proper tissue organization. This  
3 process is often controlled by extrinsic cues such as Wnt signals. Wnt reception has been  
4 previously shown to induce cell polarization and asymmetric cell division (ACD), in an  
5 evolutionarily conserved manner (Goldstein et al., 2006; Huang and Niehrs, 2014; Mizumoto  
6 and Sawa, 2007; Ouspenskaia et al., 2016; Sugioka et al., 2011; Walston et al., 2004). Wnt  
7 signalling plays a crucial role in the stem cell niche, where stem cells receive Wnts as a cue  
8 for self-renewal and cell fate determination (Clevers et al., 2014; Garcin and Habib, 2017).  
9 Although *in vivo* lineage tracing, genetic analysis and *in vitro* studies have provided crucial  
10 understanding of the effects of Wnt on stem cell biology (Mills et al., 2017), technical  
11 limitations have impeded the study of dynamic, localized Wnt reception at the single stem  
12 cell level. Understanding these early processes of ligand recruitment to the stem cell  
13 membrane may prove beneficial for regenerative medicine and the targeting of Wnt-related  
14 diseases. By harnessing the dynamics of Wnt ligand-cell interactions, interventions focused  
15 on Wnt ligands, receptors or other signalling components on the membrane may be made  
16 more selective, targeted, and better positioned for clinically viable strategies.

17 We have developed a system for the presentation of biologically active Wnt ligands  
18 covalently immobilized to a bead (Wnt-bead) (Habib et al., 2013; Lowndes et al., 2017),  
19 allowing the direct visualization of Wnt ligands during dynamic ligand-membrane  
20 interactions. Recently, we found that ESCs generate specialized cytonemes that selectively  
21 recruit self-renewal Wnt-beads in a process that requires iGluR activity (Junyent et al.,  
22 2020). Subsequently, Wnt-beads induce oriented ACD in single ESCs (Habib et al., 2013).  
23 In this manuscript, we present a temporal analysis spanning the entire duration of the stem  
24 cell—Wnt-bead interaction: from cell morpho-motility prior to contact and initial bead  
25 recruitment through cytonemes, to dynamics during Wnt-cell membrane interaction leading  
26 to the later cellular effects on spindle orientation and ACD. Initially, we revealed differences  
27 in the pattern of cytoneme formation at the population level. ESCs under CNQX inhibition, or  
28 KO for Lrp6 or  $\beta$ -catenin, form cytonemes at the same rate as WT ESCs. They have a  
29 mostly linear increase in the proportion of cells with cytonemes over time, reaching  
30 approximately 40% within 4 hours of attachment.

31 The Wnt co-receptors Lrp5 and Lrp6 have mostly been studied in the context of  $\beta$ -catenin  
32 dependent signalling, where they are attributed to have broadly overlapping functions (He et  
33 al., 2004; Houston and Wylie, 2002; Kelly et al., 2004; Tamai et al., 2000; Wehrli et al.,  
34 2000), albeit to different levels of efficiency (Holmen et al., 2002; MacDonald et al., 2011).  
35 Our unique system demonstrates differing roles between Lrp5 and Lrp6. The endogenous

1 expression of Lrp6 alone in ESCs (in Lrp5KO) results in an increased rate of cytoneme  
2 formation over WT ESCs, reaching 55.53% of cells with cytonemes after 3 hours. Together  
3 with a reduction in the rate of cytoneme formation in Lrp5/6dKO, this suggests that Lrp6 has  
4 a distinct role in the regulation of the cytoskeleton. Both Lrp5 and Lrp6 contain proline rich  
5 motifs (XPPPP) in the cytoplasmic domain that can bind to regulators of actin filaments  
6 responsible for changes to their elongation and dynamics (Brown et al., 1998; Krause et al.,  
7 2003; Lian et al., 2016; Zhu et al., 2012). Lrp6 binds Filamin A (FlnA), an anchor of  
8 transmembrane proteins to, and regulator of, the actin cytoskeleton (Lian et al., 2016).  
9 Despite 69% sequence identity overall between Lrp5 and Lrp6 (MacDonald et al., 2011), the  
10 corresponding region in Lrp5 has 37% identity. Such differences might contribute to  
11 differential roles in the organization of the actin cytoskeleton, and interaction with the  
12 machinery required for cytoneme formation/elongation. We suggest that Lrp5 may be acting  
13 in competition with Lrp6 for the interaction of Wnt-pathway components or cytoskeletal  
14 regulators. Hence, upon Lrp5 KO, this competition may be lifted, resulting in improved Lrp6-  
15 cytoskeleton interaction and the increased rate of cytoneme formation and initial Wnt3a-  
16 bead recruitment observed in Lrp5KO ESCs.

17 The rate of Wnt-bead accumulation by KO cells is also affected. During the early interaction,  
18 WT ESCs use cytonemes to recruit and retain Wnt3a-beads efficiently, reaching 66.75% of  
19 cells with beads after 12 hours, positioning them near the centre of the cell with limited  
20 movement. WT ESCs are unable to recruit iWnt3a-beads with the same efficiency: ESCs  
21 maintain iWnt3a-beads nearer the periphery of the cell, and their interactions are shorter and  
22 less stable. KO of pathway components Lrp5, Lrp6 or  $\beta$ -catenin, or inhibition of iGluRs, also  
23 reduces the ability to position a Wnt3a-bead on the membrane near the centre of the cell.  
24 While Lrp6,  $\beta$ -catenin and iGluR activity play an important role in the recruitment of Wnt3a-  
25 beads, Lrp5 is important for the stabilization of the Wnt-cell interaction both in space and  
26 over time.

27 The control of positioning of the Wnt3a-bead in WT ESCs may facilitate efficient protein  
28 interactions required for signal transduction, enhancing downstream pathway activation.  
29 Beyond the ligand-receptor binding, Wnt-pathway component polarization (Capelluto et al.,  
30 2002) and oligomerization (Cong et al., 2004) are suggested to play roles in the  
31 enhancement or modulation of Wnt signaling (Bilic et al., 2007). Here, the spatial  
32 stabilization and colocalization of upstream and downstream pathway components at a  
33 'signalling hub' may be critical for efficient signal transmission. Membrane receptors,  
34 including glutamate receptors (Yang et al., 2006), have been demonstrated to flow from  
35 membrane protrusion towards the centre of the cell. This motion can be promoted by  
36 directed movement of the actin cytoskeleton (Hanley, 2014; Yu et al., 2010) and its efficiency

1 can be governed by the activation of the pathway (Hartman et al., 2009). Areas of relative  
2 membrane concavity, such as the cell centre away from the periphery, have also been  
3 shown to enhance membrane receptor interactions with intracellular components  
4 (Rangamani et al., 2013). This process may be required for the enhancement, or  
5 maximization, of signalling transmission (Schmick and Bastiaens, 2014).

6 Following early Wnt-bead recruitment and upon progression to mitosis, WT ESCs orientate  
7 the spindle towards the source of localized Wnt3a at anaphase. Perturbation of the Wnt/ $\beta$ -  
8 catenin pathway components or iGluR activity inhibition resulted in significant impairment of  
9 the alignment of the spindle to localized Wnt3a. Furthermore, an asymmetric presentation of  
10 Wnt3a at division leads to the asymmetric distribution of pluripotency markers in the dividing  
11 WT ESCs. The Wnt-proximal cell retains the majority of pluripotency marker expression in  
12 these doublets, indicating self-renewal, while the Wnt-distal cell has a more differentiated  
13 fate. Asymmetric cell division is impaired when the ESCs lack Lrp6,  $\beta$ -catenin or iGluR  
14 activity. Lrp5 KO ESCs remain able to asymmetrically segregate pluripotency markers to the  
15 proximal cell. This data suggests a differential requirement for Lrp6 and Lrp5 in ACD, which  
16 is also  $\beta$ -catenin dependent, as corroborated by severe impairment of ACD in  $\beta$ KO.

17 Our study also distinguishes  $\beta$ -catenin dependent and independent processes in early Wnt  
18 ligand-receptor interaction and cellular outcomes. Wnt-recruitment, Wnt-positioning, spindle  
19 orientation, and ACD, while requiring the activity of Wnt co-receptors and iGluRs, are  $\beta$ -  
20 catenin dependent. The rate of cytoneme formation, cell motility, and localized Wnt-  
21 retention, however, appear to be  $\beta$ -catenin independent, despite involvement of Wnt co-  
22 receptors Lrp5/6. We previously found that  $\beta$ -catenin had an inverse relationship with the  
23 number of cytonemes in ESCs (Junyent et al., 2020). Furthermore, while individual  
24 interactions of cytoneme and Wnt3a-bead were equally efficient in WT and  $\beta$ KO ESCs  
25 (Junyent et al., 2020), here we demonstrate that the population-level accumulation of Wnt3a-  
26 beads is severely attenuated. Our results in the  $\beta$ -catenin and co-receptor KOs blur the lines  
27 between canonical and non-canonical Wnt pathways, instead suggesting an integrated,  
28 complex response to localized Wnt reception that affects stem cell biology in multiple  
29 aspects.

30 iGluR activity, and its crosstalk with the Wnt/ $\beta$ -catenin pathway, controls recruitment of Wnt  
31 signals in ESCs. Surprisingly, we found that iGluR activity is further involved in many of the  
32 subsequent processes of Wnt-interaction. At the population level, iGluR inhibition reduces  
33 the accumulation of Wnt3a-bead, despite having no significant effect on the rate cytoneme  
34 formation or cell motility. iGluR activity is shown to have a major role in the dynamics of Wnt  
35 on the membrane, spindle orientation, and to an extent, the Wnt3a-mediated determination

1 of cell fate. We propose that crosstalk between the activity of iGluRs and Lrp6 controls the  
2 prolonged coupling of the two pathways, resulting in highly overlapping effects of Lrp6 or  
3 iGluR perturbation.

4 As many stem cells express glutamatergic receptors (Skerry and Genever, 2001) and rely on  
5 Wnts for their self-renewal (Clevers et al., 2014), investigation of equivalent effects in the  
6 biology of adult stem cells is required. Our results suggest a crosstalk between iGluRs and  
7 Wnt-pathway activity in ESCs that affects cell and signal kinetics throughout Wnt signal  
8 recruitment and the cellular outcome of oriented ACD. The iGluR-Wnt pathway crosstalk  
9 may therefore prove to be a pervasive mechanism in the coordination throughout cell fate  
10 determination and tissue patterning in many cell types and biological systems.

11

12



## 1 MATERIALS AND METHODS

### 2 Cell culture

3 Wild-type W4 (129S6/SvEvTac) mouse ESCs or ESCs knock-out for Lrp5, Lrp6 or  
4 Lrp5/6dKO (Junyent et al., 2020) were maintained in ESC basal media containing Advanced  
5 DMEM/F12 (cat. num. 12634028, Life Technologies), 10% ESC-qualified fetal bovine serum  
6 (eFBS, cat. num. ES-009-B, Millipore), 1% penicillin-streptomycin (P-S, cat. num. P4333,  
7 Sigma), 2 mM Glutamax (cat. num. 35050061, Life Technologies), 50  $\mu$ M  $\beta$ -mercaptoethanol  
8 (2ME, cat. num. 21985-023, Gibco) and 1000 U/mL recombinant Leukemia Inhibitory Factor  
9 (LIF; cat. num. 130-095-775, Milteny), supplemented with with 2i: MEK inhibitor PD0325901  
10 (1  $\mu$ M, cat. num. 130-104-170, Miltenyi) and GSK3 inhibitor CHIR99021 (3  $\mu$ M, cat. num.  
11 130-104-172, Miltenyi). Heterozygous  $\beta$ -catenin deficient ( $\beta^{f/-}$ ) ESCs, with an inducible floxed  
12  $\beta$ -catenin allele, and stably carrying a Cre-ER-T2 cassette under the control of a chicken  $\beta$ -  
13 actin promoter (Raggioli et al., 2014) were cultured in the same conditions. Media was  
14 changed daily, and cells were grown at low density until formation of mid-sized colonies  
15 before passaging (every 3-4 days). To passage ESCs, colonies were rinsed with PBS,  
16 trypsinised, neutralized and centrifuged at 1.2 x *g* for 4 minutes. Pelleted cells were  
17 resuspended in ESC basal media and counted to obtain 7,000 cells/well and transferred to a  
18 clean tissue culture-treated 6-well plate. In some experiments, 24 hours prior to use, 2i was  
19 withdrawn and replaced with soluble Wnt3a protein (200 ng/mL).

20 Generation of inducible  $\beta$ -catenin knock-out from  $\beta^{f/-}$  cells was achieved through the addition  
21 of 0.1  $\mu$ g/mL 4-hydroxy-tamoxifen (4-HT) (cat. num. H6278, Sigma) to the media every 24  
22 hours for 72 hours (referred as  $\beta$ KO in the text).  $\beta$ KO cells were always 4-HT treated for 3  
23 days before experimentation.

24 All cell lines were maintained at 37°C, 5%CO<sub>2</sub> and were routinely tested for mycoplasma  
25 infection.

### 26 Preparation of Wnt3a-microbeads

27 Recombinant Wnt3a proteins were produced as described before (Habib et al., 2013;  
28 Junyent et al., 2020), or purchased (cat. num. 1324-WN, R&D systems). Wnt3a proteins  
29 were immobilized to 2.8  $\mu$ m carboxylic acid coated Dynabeads® (cat. num. 14305D,  
30 ThermoFisher), as described before (Habib et al., 2013; Junyent et al., 2020; Lowndes et al.,  
31 2017). Briefly, the carboxylic acid groups on the Dynabeads® were activated by 30-minute  
32 incubation with carbodiimide (cat. num. E7750-1G, Sigma) and N-hydroxyl succinamide (cat.  
33 num. 56480-25G, Sigma) (50 mg/mL each, dissolved in 25 mM cold 2-(N-morpholino)  
34 ethanesulfonic acid (MES) (cat. num. M3671-50G, Sigma) buffer (pH5) with constant

1 rotation. Following activation, beads were retained by using a magnet and washed three  
2 times with 25 mM MES buffer (pH5). Soluble Wnt3a protein (500 ng) was diluted 1:5 in MES  
3 buffer (pH5) and incubated with the beads for 1 hour with constant agitation, at room  
4 temperature (RT). Beads were washed again three times with PBS (pH 7.4) before storage  
5 in media containing 10% FBS at 4°C. Inactivation of Wnt3a beads was achieved through  
6 incubation with 10 mM Dithiothreitol (DTT; Life Technologies, #P2325) for 30 minutes at  
7 37°C. Following incubation with DTT, beads were washed three times in PBS before storage  
8 in media containing 10% FBS at 4°C (up to 10 days). Bead activity was validated as  
9 described before (Habib et al., 2013; Junyent et al., 2020; Lowndes et al., 2017)

#### 10 Live-cell imaging and image analysis and spindle orientation

11 ESCs were seeded at 2,500 cells per well of a clear-bottomed, tissue culture treated, plastic,  
12 black 96 well plate in complete media containing LIF (no 2i). 0.3 µg Wnt3a-beads were  
13 added per well. The 96 well plate was placed into the Zeiss inverted Axio Imager  
14 epifluorescence microscope, equipped with a CoolSNAP HQ2 CCD camera. Cells were  
15 allowed to settle in the microscope at 37°C, 5% CO<sub>2</sub> for 30 minutes prior to imaging.  
16 Between 20-30 positions were selected, and cells were imaged at 10X (N/A = 0.3) in  
17 brightfield every 1 minute for 12-15 hours.

18 The resulting videos were analysed to measure the percentage of cells with cytonemes, the  
19 percentage of cells with beads and the bead retention time in all conditions. “Manual  
20 tracking” tool in Fiji (ImageJ) was used to measure the Wnt-bead position, the cell-centre  
21 position and the radius of the cell every minute for 180 minutes (3h) after bead recruitment  
22 through a cytoneme. The resulting data was used to measure cell movement, position of the  
23 Wnt bead on top of the cell and Wnt bead movement, normalized to cell movement.

24 Cells dividing in contact with a Wnt3a-bead were measured to analyse spindle orientation.  
25 The “Angle” tool in Fiji (ImageJ) was used to measure the angle between the minor axis and  
26 the Wnt-bead position at the same point in anaphase for all conditions (**Fig. 4A and B**).

#### 27 Immunofluorescence and measurement of asymmetric cell division

28 ESCs were seeded at 3,000 cells/well + 0.3 µg Wnt3a-bead/well onto human fibronectin (10  
29 µg/mL, cat. um. 7340101, VWR/SLS) coated 8-well slides (cat. num. 80828, Thistle  
30 Scientific) in complete media containing LIF (no 2i). Slides were incubated for 7h at 37°C,  
31 5%CO<sub>2</sub>. After incubation, media was pipetted out and cells were fixed with 4%PFA for 8 min  
32 at room temperature (RT). Cells were then washed 3 times in staining buffer (Phosphate  
33 buffered saline (PBS, cat. num. d8537, Sigma), with 0.1% Bovine Serum Albumin (cat. num.  
34 A8806, Sigma), 0.05% Sodium Azide and 0.001% Tween20 (cat. num. P2287, Sigma)) for 5

1 minutes each. Slides were incubated in primary antibody diluted in staining buffer at 4°C  
2 overnight. Primary antibodies used were anti-Rex1 (Rabbit; Abcam, ab28141), anti-Nanog  
3 (Rabbit, Reprocell, RCAB002P-F) and anti- $\beta$ -catenin (Mouse; BD Transduction, #610154).  
4 Then, slides were carefully washed 3 times for 5 minutes in staining buffer and incubated  
5 with AlexaFluor-conjugated secondary antibodies (Life Technologies) diluted in staining  
6 buffer, for 1h at RT. Final washes were performed with staining buffer containing Hoechst  
7 33342 (cat. num. H3570, Life Technologies) at 1:2000 dilution. Slides were carefully  
8 mounted with ProLong mounting media (cat. num. P10144, Life Technologies) and curated  
9 for 24-48h before imaging. Slides were imaged on a Zeiss inverted Axio Imager  
10 epifluorescence microscope using Zen 2 (Blue edition) software, 40x (NA = 1.3), equipped  
11 with a CoolSNAP HQ2 CCD camera. Z-stacks were taken according to the optimal interval,  
12 and the range obtained based on  $\beta$ -catenin signal. Images were processed, deconvolved,  
13 and quantified by supervised quantification using Volocity software (Perkin Elmer).

14 Supervised quantification involved reconstructing the cell using fluorescence staining and  
15 manual identification of divided cells. The cell proximal to the bead was defined as the region  
16 of interest (ROI), and the distal cell was defined as the fluorescence minus the proximal cell  
17 (ROI). Cells were compartmentalized based on DAPI staining for nucleus and the remainder  
18 of the cell minus DAPI comprised the cytoplasmic region. Protein distribution in the doublets  
19 was established as follow: Proximal, >55% of protein in bead-proximal cell; Distributed, 55%  
20 to 45% of protein in bead-proximal cell; Distal, <45% of protein in bead-proximal cell.

#### 21 Live cell holotomographic microscopy

22 Holotomographic images were obtained by using 3D Cell Explorer (Nanolive) microscope  
23 equipped with a 60x (N.A. 0.8) lens. Images were analysed using STEVE® software  
24 (Nanolive) and Fiji (ImageJ).

#### 25 Fluorescence Activated Cell Sorting

26 Fluorescence activated cell sorting (FACS) was employed to detect Wnt3a response of WT  
27 or KO ESCs stably infected with 7xTCF-eGFP//SV40-mCherry (Junyent et al., 2020).  
28 Infected cells were sorted to gain a pure mCherry+ population. Following stimulation with  
29 Wnt3a or control media (ESC basal media) for 24h, cells were harvested using 0.25%  
30 trypsin-EDTA solution, filtered and analyzed using the FACSFortessa system (BD  
31 Biosciences). The gating strategy included gating for SSC-FSC, SSC-A-SSC-W, SSC-DAPI  
32 (alive cells), SSC-PE Texas Red (mCherry+ cells), and SSC-FITC (eGFP+ cells). Cells were  
33 prepared for FACS and analysis was performed as described before. Analysis was  
34 performed using FlowJo software (FlowJo).

## 1 Statistical analysis

2 Data representation and statistical analysis were performed using Prism (GraphPad), as  
3 described in the figures. ANOVA (one- or two-way) analysis, followed by Tukey's multiple  
4 comparisons test was performed to compare data between conditions. For analysis of  
5 spindle orientation, the Kolmogorov-Smirnov statistical test was performed to compare  
6 between conditions of non-normally distributed data and Chi-square analysis was performed  
7 to compare between observed data and the expected/randomized distribution. The statistical  
8 analysis used for each assay is described in the figure legends. In all experiments, biological  
9 replicates (n) for each assay comprise of experiments performed independently from one  
10 another, and as such are from different cultured populations/passages of cells, different  
11 sessions of imaging/measurement, and independent media/reagent/cell dilution. Sample  
12 sizes (N) were selected such that the power of the statistical analysis performed was  
13 sufficient, in accordance with previous studies (Habib et al., 2013; Junyent et al., 2020).  
14 Outliers were considered as individual data points significantly outside the range of  
15 possible/meaningful values for each assay and were excluded from subsequent analysis.  
16 For all figures, symbols indicate statistical significance as follows: \* $p < 0.05$ , \*\* $p < 0.01$ , \*\*\* $p <$   
17  $0.001$ , \*\*\*\* $p < 0.0001$ . Non-significance was set as  $p > 0.05$ . All numerical source data, as  
18 well as statistical analysis results including 95% confidence interval and adjusted  $p$ -values  
19 can be consulted in the source data file for each figure.

20

21

22

23

24

## 1    **ACKNOWLEDGEMENTS**

2    We acknowledge financial support from the Department of Health via the National Institute  
3    for Health Research (NIHR) Comprehensive Biomedical Research Centre award to the  
4    Guy's & St Thomas National Health Service Foundation Trust in partnership with King's  
5    College London and the King's College Hospital NHS Foundation Trust. This work was  
6    supported by a Sir Henry Dale Fellowship (102513/Z/13/Z) to S.J.H.

7

## 8    **CONTRIBUTION**

9    S.J., J.R. and S.J.H. designed the study, performed experiments and analysed data, wrote  
10   the manuscript and prepared figures. J.L.A.S, C.L.G and T-J.T. performed experiments and  
11   analysed data. M.W. analysed data. S.J.H lead the project and provided financial support for  
12   the project.

13

## 14   **COMPETING INTERESTS**

15   No competing interests.

16

## 17   **REFERENCES**

- 18   Akong K, McCartney BM, Peifer M. 2002. Drosophila APC2 and APC1 have overlapping  
19   roles in the larval brain despite their distinct intracellular localizations. *Dev Biol* **250**:71–  
20   90. doi:10.1006/dbio.2002.0777
- 21   Bahmanyar S, Kaplan DD, DeLuca JG, Giddings TH, O'Toole ET, Winey M, Salmon ED,  
22   Casey PJ, Nelson WJ, Barth AIM. 2008.  $\beta$ -catenin is a Nek2 substrate involved in  
23   centrosome separation. *Genes Dev* **22**:91–105. doi:10.1101/gad.1596308
- 24   Bertrand V. 2016. B-Catenin-Driven Binary Cell Fate Decisions in Animal Development.  
25   *Wiley Interdiscip Rev Dev Biol* **5**:377–388. doi:10.1002/wdev.228
- 26   Bienz. 2005.  $\beta$ -Catenin: A Pivot between Cell Adhesion and Wnt Signalling Mutual. *Curr Biol*  
27   **15**:64–67. doi:10.1016/j.cub.2004.12.058
- 28   Bilic J, Huang Y-L, Davidson G, Zimmermann T, Cruciat C-M, Bienz M, Niehrs C. 2007. Wnt  
29   Induces LRP6 Signalosomes and Promotes Dishevelled-Dependent LRP6  
30   Phosphorylation. *Science (80- )* **316**:1619–1622. doi:10.1126/science.1137065

- 1 Brown SD, Twells RCJ, Hey PJ, Cox RD, Levy ER, Soderman AR, Metzker ML, Caskey CT,  
2 Todd JA, Hess JF. 1998. Isolation and characterization of LRP6, a novel member of the  
3 low density lipoprotein receptor gene family. *Biochem Biophys Res Commun* **248**:879–  
4 888. doi:10.1006/bbrc.1998.9061
- 5 Capelluto DGS, Kutateladze TG, Habas R, Finkielstein C V., He X, Overduin M. 2002. The  
6 DIX domain targets dishevelled to actin stress fibres and vesicular membranes. *Nature*  
7 **419**:726–729. doi:10.1038/nature01056
- 8 Clevers H. 2006. Wnt/ $\beta$ -Catenin Signaling in Development and Disease. *Cell* **127**:469–480.  
9 doi:10.1016/j.cell.2006.10.018
- 10 Clevers H, Loh KM, Nusse R. 2014. Stem cell signaling. An integral program for tissue  
11 renewal and regeneration: Wnt signaling and stem cell control. *Science* **346**:1248012.  
12 doi:10.1126/science.1248012
- 13 Cong F, Schweizer L, Varmus H. 2004. Wnt signals across the plasma membrane to  
14 activate the  $\beta$ -catenin pathway by forming oligomers containing its receptors, Frizzled  
15 and LRP. *Development* **131**:5103–5115. doi:10.1242/dev.01318
- 16 Davidson G, Shen J, Huang YL, Su Y, Karaulanov E, Bartscherer K, Hassler C, Stannek P,  
17 Boutros M, Niehrs C. 2009. Cell Cycle Control of Wnt Receptor Activation. *Dev Cell*  
18 **17**:788–799. doi:10.1016/j.devcel.2009.11.006
- 19 Fuerer C, Nusse R. 2010. Lentiviral vectors to probe and manipulate the Wnt signaling  
20 pathway. *PLoS One* **5**. doi:10.1371/journal.pone.0009370
- 21 Garcin CL, Habib SJ. 2017. A Comparative Perspective on Wnt /  $\beta$  -Catenin Signalling in  
22 Cell Fate Determination In: J.-P. Tassan JZK, editor. *Asymmetric Cell Division in*  
23 *Development, Differentiation and Cancer, Results and Problems in Cell Differentiation*  
24 *61*, DOI 10.1007/978-3-319-53150-2\_15. Springer International Publishing AG. pp.  
25 323–350. doi:10.1007/978-3-319-53150-2
- 26 Goldstein B, Takeshita H, Mizumoto K, Sawa H. 2006. Wnt signals can function as positional  
27 cues in establishing cell polarity. *Dev Cell* **10**:391–6. doi:10.1016/j.devcel.2005.12.016
- 28 Habib SJ, Chen B-C, Tsai F-C, Anastassiadis K, Meyer T, Betzig E, Nusse R. 2013. A  
29 Localized Wnt Signal Orients Asymmetric Stem Cell Division in Vitro. *Science (80-*  
30 **339**:1445–1448. doi:10.1126/science.1231077
- 31 Hanley JG. 2014. Actin-dependent mechanisms in AMPA receptor trafficking. *Front Cell*  
32 *Neurosci* **8**:1–8. doi:10.3389/fncel.2014.00381

- 1 Hartman NC, Nye JA, Groves JT. 2009. Cluster size regulates protein sorting in the  
2 immunological synapse. *Proc Natl Acad Sci U S A* **106**:12729–12734.  
3 doi:10.1073/pnas.0902621106
- 4 He X, Semenov M, Tamai K, Zeng X. 2004. LDL receptor-related proteins 5 and 6 in Wnt/ $\beta$ -  
5 catenin signaling: Arrows point the way. *Development* **131**:1663–1677.  
6 doi:10.1242/dev.01117
- 7 Hendriksen J, Jansen M, Brown CM, van der Velde H, van Ham M, Galjart N, Offerhaus GJ,  
8 Fagotto F, Fornerod M. 2008. Plasma membrane recruitment of dephosphorylated  $\beta$ -  
9 catenin upon activation of the Wnt pathway. *J Cell Sci* **121**:1793–1802.  
10 doi:10.1242/jcs.025536
- 11 Holmen SL, Salic A, Zylstra CR, Kirschner MW, Williams BO. 2002. A novel set of Wnt-  
12 Frizzled fusion proteins identifies receptor components that activate  $\beta$ -catenin-  
13 dependent signaling. *J Biol Chem* **277**:34727–34735. doi:10.1074/jbc.M204989200
- 14 Houston DW, Wylie C. 2002. Cloning and expression of *Xenopus* Lrp5 and Lrp6 genes.  
15 *Mech Dev* **117**:337–342. doi:10.1016/S0925-4773(02)00205-8
- 16 Huang P, Senga T, Hamaguchi M. 2007. A novel role of phospho- $\beta$ -catenin in microtubule  
17 regrowth at centrosome. *Oncogene* **26**:4357–4371. doi:10.1038/sj.onc.1210217
- 18 Huang YL, Niehrs C. 2014. Polarized Wnt signaling regulates ectodermal cell fate in  
19 *Xenopus*. *Dev Cell* **29**:250–257. doi:10.1016/j.devcel.2014.03.015
- 20 James RG, Conrad WH, Moon RT. 2008.  $\beta$ -Catenin-Independent Wnt Pathways: Signals,  
21 Core Proteins, and Effectors, Wnt Signaling, Volume I: Pathway Methods and  
22 Mammalian Models. doi:10.1007/978-1-59745-249-6
- 23 Junyent S, Garcin CL, Szczerkowski JLA, Trieu T-J, Reeves J, Habib SJ. 2020. Specialized  
24 cytonemes induce self-organization of stem cells. *Proc Natl Acad Sci* **117**:7236–7244.  
25 doi:10.1073/pnas.1920837117
- 26 Kaur S, Méléneć P, Murgan S, Bordet G, Recouvreux P, Lenne P-F, Bertrand V. 2020. Wnt  
27 ligands regulate the asymmetric divisions of neuronal progenitors in *C. elegans*  
28 embryos. *Development* dev.183186. doi:10.1242/dev.183186
- 29 Kelly OG, Pinson KI, Skarnes WC. 2004. The Wnt co-receptors Lrp5 and Lrp6 are essential  
30 for gastrulation in mice. *Development* **131**:2803–2815. doi:10.1242/dev.01137
- 31 Kikuchi K, Niikura Y, Kitagawa K, Kikuchi A. 2010. Dishevelled, a Wnt signalling component,  
32 is involved in mitotic progression in cooperation with Plk1. *EMBO J* **29**:3470–83.

- 1           doi:10.1038/emboj.2010.221
- 2   Kiyomitsu T, Cheeseman IM. 2013. XCortical dynein and asymmetric membrane elongation  
3           coordinately position the spindle in anaphase. *Cell* **154**:391.  
4           doi:10.1016/j.cell.2013.06.010
- 5   Komiya Y, Habas R. 2008. Wnt signal transduction pathways. *Organogenesis* **4**:68–75.  
6           doi:10.4161/org.4.2.5851
- 7   Krause M, Dent EW, Bear JE, Loureiro JJ, Gertler FB. 2003. Ena/VASP Proteins: Regulators  
8           of the Actin Cytoskeleton and Cell Migration. *Annu Rev Cell Dev Biol* **19**:541–564.  
9           doi:10.1146/annurev.cellbio.19.050103.103356
- 10   Langton PF, Kakugawa S, Vincent J-P. 2016. Making, Exporting, and Modulating Wnts.  
11           *Trends Cell Biol* **26**:756–765. doi:10.1016/j.tcb.2016.05.011
- 12   Lian G, Dettenhofer M, Lu J, Downing M, Chenn A, Wong T, Sheen V. 2016. Filamin A- and  
13           formin 2-dependent endocytosis regulates proliferation via the canonical wnt pathway.  
14           *Dev* **143**:4509–4520. doi:10.1242/dev.139295
- 15   Lowndes M, Junyent S, Habib SJ. 2017. Constructing cellular niche properties by localized  
16           presentation of Wnt proteins on synthetic surfaces. *Nat Protoc* **12**:1498–1512.  
17           doi:10.1038/nprot.2017.061
- 18   MacDonald BT, Semenov M V., Huang H, He X. 2011. Dissecting molecular differences  
19           between Wnt coreceptors LRP5 and LRP6. *PLoS One* **6**.  
20           doi:10.1371/journal.pone.0023537
- 21   Martello G, Smith A. 2014. The nature of embryonic stem cells. *Annu Rev Cell Dev Biol*  
22           **30**:647–675. doi:10.1146/annurev-cellbio-100913-013116
- 23   McCartney BM, Dierick HA, Kirkpatrick C, Moline MM, Baas A, Peifer M, Bejsovec A. 1999.  
24           Drosophila APC2 is a cytoskeletally-associated protein that regulates wingless  
25           signaling in the embryonic epidermis. *J Cell Biol* **146**:1303–1318.  
26           doi:10.1083/jcb.146.6.1303
- 27   Mills KM, Szczerkowski JLA, Habib SJ. 2017. Wnt ligand presentation and reception: from  
28           the stem cell niche to tissue engineering. *Open Biol* **7**:170140. doi:10.1098/rsob.170140
- 29   Mizumoto K, Sawa H. 2007. Cortical  $\beta$ -Catenin and APC Regulate Asymmetric Nuclear  $\beta$ -  
30           Catenin Localization during Asymmetric Cell Division in *C. elegans*. *Dev Cell* **12**:287–  
31           299. doi:10.1016/j.devcel.2007.01.004
- 32   Niehrs C, Acebron SP. 2012. Mitotic and mitogenic Wnt signalling. *EMBO J* **31**:2705–2713.



- 1           doi:10.1038/emboj.2012.124
- 2   Nusse R, Clevers H. 2017. Wnt/ $\beta$ -Catenin Signaling, Disease, and Emerging Therapeutic  
3           Modalities. *Cell* **169**:985–999. doi:10.1016/j.cell.2017.05.016
- 4   Ouspenskaia T, Matos I, Mertz AF, Fiore VF, Fuchs E. 2016. WNT-SHH Antagonism  
5           Specifies and Expands Stem Cells prior to Niche Formation. *Cell* **164**:156–169.  
6           doi:10.1016/j.cell.2015.11.058
- 7   Raggioli A, Junghans D, Rudloff S, Kemler R. 2014. Beta-Catenin Is Vital for the Integrity of  
8           Mouse Embryonic Stem Cells. *PLoS One* **9**:e86691. doi:10.1371/journal.pone.0086691
- 9   Rangamani P, Lipshtat A, Azeloglu EU, Calizo RC, Hu M, Ghassemi S, Hone J, Scarlata S,  
10           Neves SR, Iyengar R. 2013. XDecoding Information in Cell Shape. *Cell* **154**:1356.  
11           doi:10.1016/j.cell.2013.08.026
- 12   Rim EY, Kinney LK, Nusse R. 2020. Beta-catenin-mediated Wnt signal transduction  
13           proceeds through an endocytosis-independent mechanism. *Mol Biol Cell* mbc.E20-02-  
14           0114. doi:10.1091/mbc.E20-02-0114
- 15   Salinas PC. 2007. Modulation of the microtubule cytoskeleton: a role for a divergent  
16           canonical Wnt pathway. *Trends Cell Biol* **17**:333–342. doi:10.1016/j.tcb.2007.07.003
- 17   Schmick M, Bastiaens PIH. 2014. The interdependence of membrane shape and cellular  
18           signal processing. *Cell* **156**:1132–1138. doi:10.1016/j.cell.2014.02.007
- 19   Sedgwick AE, D’Souza-Schorey C. 2016. Wnt signaling in cell motility and invasion: Drawing  
20           parallels between development and cancer. *Cancers (Basel)* **8**:1–15.  
21           doi:10.3390/cancers8090080
- 22   Skerry TM, Genever PG. 2001. Glutamate signalling in non-neuronal tissues. *Trends*  
23           *Pharmacol Sci* **22**:174–181. doi:10.1016/S0165-6147(00)01642-4
- 24   Stamatakou E, Hoyos-Flight M, Salinas PC. 2015. Wnt signalling promotes actin dynamics  
25           during axon remodelling through the actin-binding protein Eps8. *PLoS One* **10**:1–19.  
26           doi:10.1371/journal.pone.0134976
- 27   Stanganello E, Zahavi EE, Burute M, Smits J, Jordens I, Maurice MM, Kapitein LC,  
28           Hoogenraad CC. 2019. Wnt Signaling Directs Neuronal Polarity and Axonal Growth.  
29           *iScience* **13**:318–327. doi:10.1016/j.isci.2019.02.029
- 30   Sugioka K, Mizumoto K, Sawa H. 2011. Wnt regulates spindle asymmetry to generate  
31           asymmetric nuclear  $\beta$ -catenin in *C. elegans*. *Cell* **146**:942–954.  
32           doi:10.1016/j.cell.2011.07.043

- 1 Tahinci E, Thorne CA, Franklin JL, Salic A, Christian KM, Lee LA, Coffey RJ, Lee E. 2007.  
2 Lrp6 is required for convergent extension during *Xenopus* gastrulation. *Development*  
3 **134**:4095–4106. doi:10.1242/dev.010272
- 4 Takada R, Satomi Y, Kurata T, Ueno N, Norioka S, Kondoh H, Takao T, Takada S. 2006.  
5 Monounsaturated Fatty Acid Modification of Wnt Protein: Its Role in Wnt Secretion. *Dev*  
6 *Cell* **11**:791–801. doi:10.1016/j.devcel.2006.10.003
- 7 Tamai K, Semenov M, Kato Y, Spokony R, Liu C, Katsuyama Y, Hess F, Saint-Jeannet JP,  
8 He X. 2000. LDL-receptor-related proteins in Wnt signal transduction. *Nature* **407**:530–  
9 535. doi:10.1038/35035117
- 10 ten Berge D, Kurek D, Blauwkamp T, Koole W, Maas A, Eroglu E, Siu RK, Nusse R. 2011.  
11 Embryonic stem cells require Wnt proteins to prevent differentiation to epiblast stem  
12 cells. *Nat Cell Biol* **13**:1070–5. doi:10.1038/ncb2314
- 13 Walston T, Tuskey C, Edgar L, Hawkins N, Ellis G, Bowerman B, Wood W, Hardin J. 2004.  
14 Multiple Wnt signaling pathways converge to orient the mitotic spindle in early *C.*  
15 *elegans* embryos. *Dev Cell* **7**:831–841. doi:10.1016/j.devcel.2004.10.008
- 16 Wehrli M, Dougan ST, Caldwell K, O’Keefe L, Schwartz S, Valzel-Ohayon D, Schejter E,  
17 Tomlinson A, DiNardo S. 2000. Arrow encodes an LDL-receptor-related protein  
18 essential for Wingless signalling. *Nature* **407**:527–530. doi:10.1038/35035110
- 19 Willert K, Brown JD, Danenberg E, Duncan AW, Weissman IL, Reya T, Yates JR, Nusse R.  
20 2003. Wnt proteins are lipid-modified and can act as stem cell growth factors. *Nature*  
21 **423**:448–452. doi:10.1038/nature01611
- 22 Willert K, Nusse R. 2012. Wnt proteins. *Cold Spring Harb Perspect Biol* **4**:1–14.  
23 doi:10.1101/cshperspect.a007864
- 24 Yang G, Huang A, Zhu S, Xiong W. 2006. It is time to move: Role of lateral diffusion in  
25 AMPA receptor trafficking. *J Neurosci* **26**:9082–9083. doi:10.1523/JNEUROSCI.3018-  
26 06.2006
- 27 Ying Q-L, Wray J, Nichols J, Batlle-Morera L, Doble B, Woodgett J, Cohen P, Smith A. 2008.  
28 The ground state of embryonic stem cell self-renewal. *Nature* **453**:519–523.  
29 doi:10.1038/nature06968
- 30 Yu C han, Wu HJ, Kaizuka Y, Vale RD, Groves JT. 2010. Altered actin centripetal retrograde  
31 flow in physically restricted immunological synapses. *PLoS One* **5**:1–9.  
32 doi:10.1371/journal.pone.0011878

- 1 Zhu Y, Tian Y, Du J, Hu Z, Yang L, Liu J, Gu L. 2012. Dvl2-dependent activation of Daam1
- 2 and RhoA regulates Wnt5a-induced breast cancer cell migration. *PLoS One* **7**.
- 3 doi:10.1371/journal.pone.0037823

4

5

## 1 FIGURES AND FIGURE LEGENDS

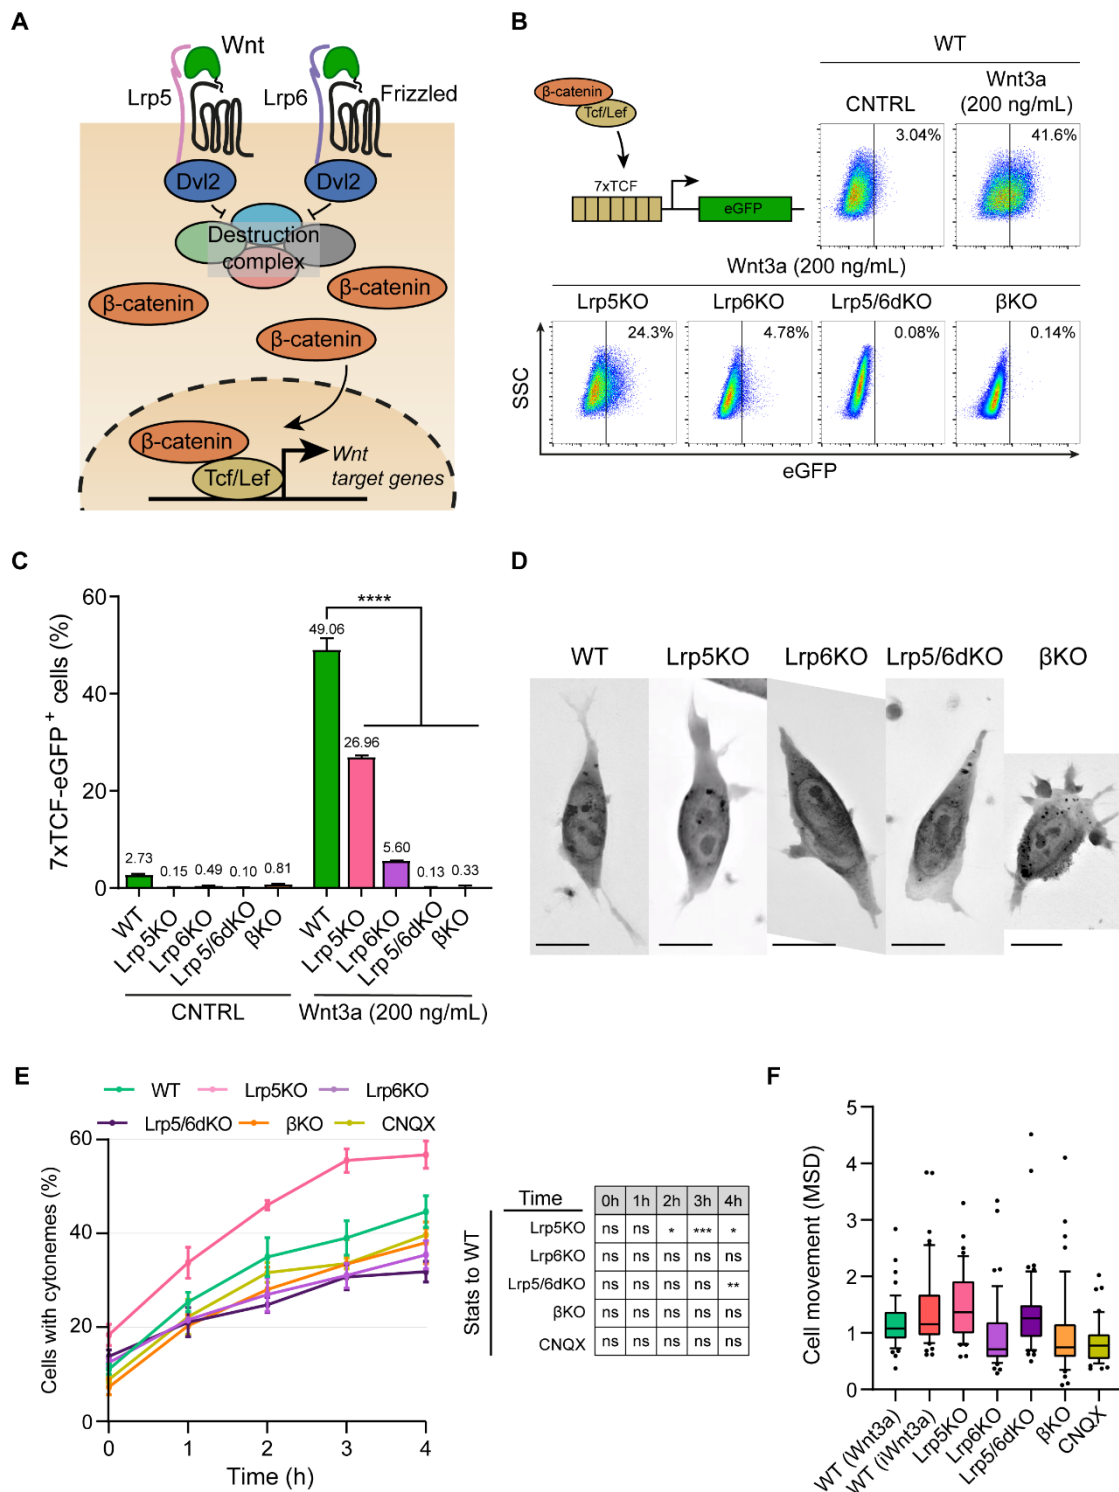

2

3 **FIGURE 1. The requirements of components of the Wnt/β-catenin for Wnt**  
 4 **responsiveness and cytoneme formation.**

5 **A.** Schematic and simplified representation of the Wnt/β-catenin pathway. Wnt binding to the  
 6 receptor Frizzled and the co-receptors Lrp5 and Lrp6 induces the inhibition of the β-catenin

1 destruction complex (Axin2, Gsk3, Ck1, APC) through Dvl2.  $\beta$ -catenin is stabilized and  
2 translocated to the nucleus, where it binds Tcf/Lef to initiate the transcription of Wnt target  
3 genes.

4 **B.** (*Top left*) Schematic representation of the 7xTCF-eGFP Wnt/ $\beta$ -catenin reporter. (*Top right*  
5 and *Bottom*) Representative dot-plots depicting the levels of eGFP expression in WT or Wnt  
6 pathway KO ESCs carrying the 7xTCF-eGFP reporter and treated with CNTRL solution or  
7 200 ng/mL soluble Wnt3a for 24h. Y axis is SSC.

8 **C.** Quantification of the percentage of 7xTCF-eGFP<sup>+</sup> cells, as described in **B.**  $n \geq 3$ . Bar is  
9 mean, error bars indicate SEM. Stars indicate statistical significance calculated by two-way  
10 ANOVA with Tukey multiple comparison tests, as follows: \*\*\*\* $p < 0.0001$ .

11 **D.** Representative images of the protrusions generated by WT or Wnt pathway KO ESCs,  
12 imaged by holographic-tomographic 3D microscopy. Scale bars, 20  $\mu\text{m}$ .

13 **E.** Quantification of the percentage of WT ESCs, Wnt pathway KO ESCs, or WT ESCs  
14 treated with 10  $\mu\text{M}$  CNQX, with cytonemes at 0 to 4 hours after seeding. Line is centred on  
15 mean, error bars indicate SEM.  $n \geq 3$ ,  $N \geq 30$  cells per timepoint and per  $n$ . Stars in box  
16 (*right*) indicate statistical significance to WT, calculated by two-way ANOVA with Tukey  
17 multiple comparison tests, as follows: ns (*non-significant*,  $p > 0.05$ ) \* $p < 0.05$ , \*\* $p < 0.01$ , \*\*\* $p$   
18  $< 0.001$ .

19 **F.** Quantification of cell movement, presented as mean squared displacement (MSD), for WT  
20 ESCs co-cultured with Wnt3a-beads or iWnt3a-beads, Wnt pathway KO ESCs co-cultured  
21 with Wnt3a-beads, or WT ESCs treated with 10  $\mu\text{M}$  CNQX and co-cultured with Wnt3a-  
22 beads. Cells were tracked for 3h after protrusion generation. Box represents median and  
23 quartiles, error bars represent 10-90 percentile, dots are data outside 10-90 percentile  
24 range. Data is pooled from  $n \geq 3$  experiments, total of  $N \geq 44$  cells. Statistical non-  
25 significance to WT condition was verified by one-way ANOVA with Tukey multiple  
26 comparison test.

27

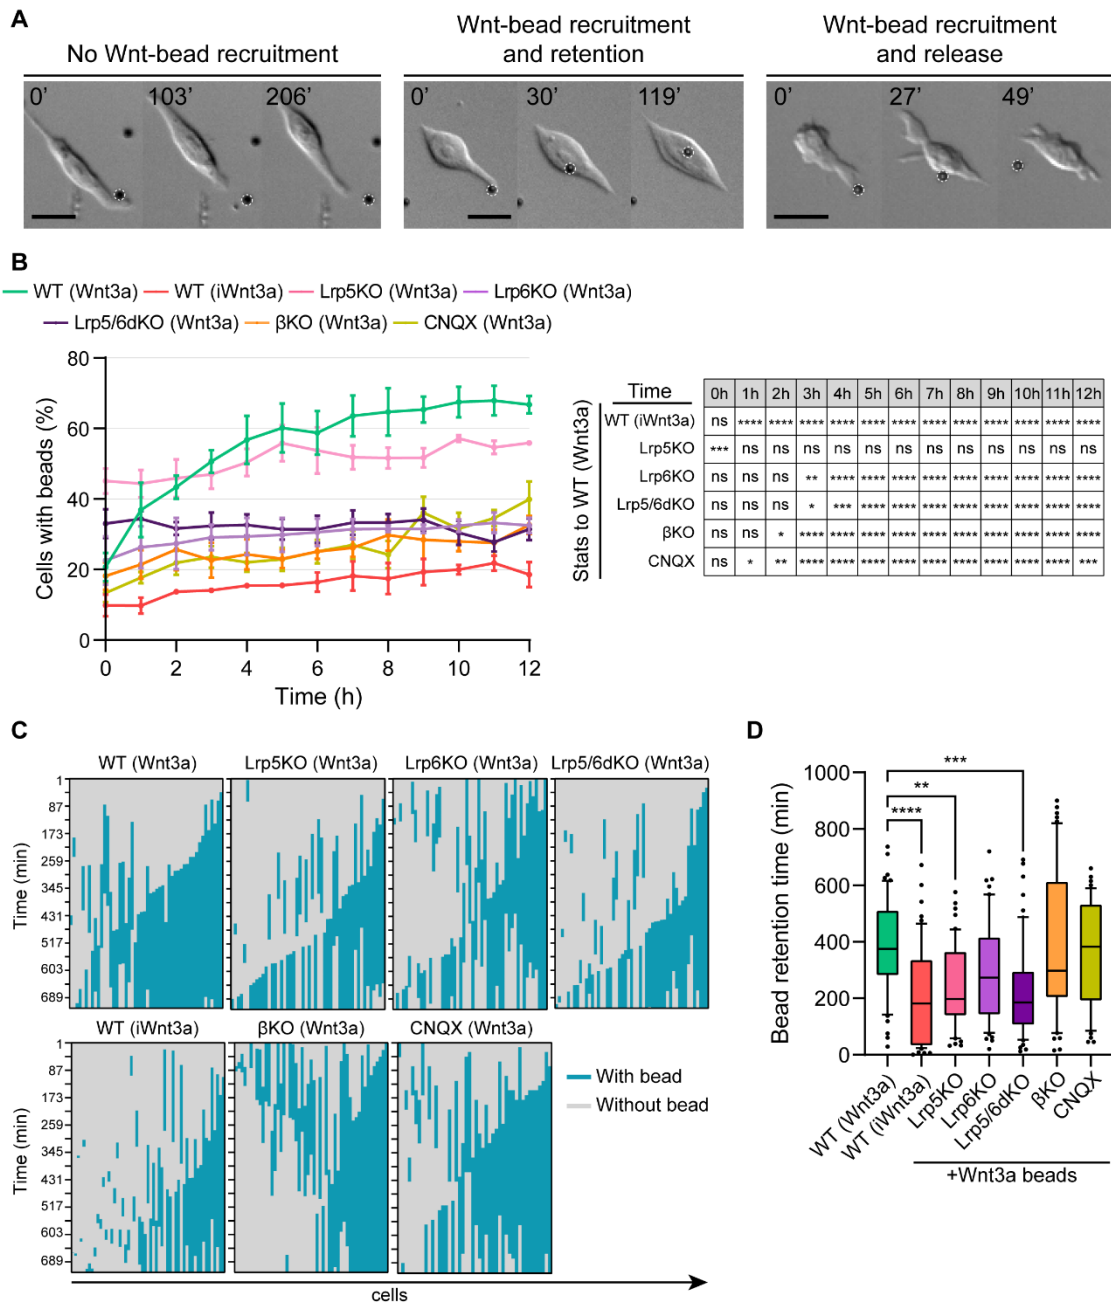

1

2 **FIGURE 2. Wnt co-receptors and iGluR activity orchestrate the interaction dynamics**  
 3 **between localized Wnt3a and the ESC membrane**

4 **A.** Representative frames of time-course live imaging displaying an ESC contacting a Wnt-  
 5 bead without further recruitment (*left*), an ESC contacting a Wnt-bead, recruiting it and  
 6 retaining it at the membrane for a long period (*middle*), or an ESC recruiting a Wnt-bead and  
 7 releasing it (*right*). Scale bars, 20 μm. Wnt-beads are highlighted by white dashed circle.  
 8 Time is minutes.

9 **B.** Quantification of the percentage of WT ESCs, Wnt pathway KO ESCs, or WT ESCs  
 10 treated with 10 μM CNQX, contacting Wnt3a-beads or inactive Wnt3a-beads (iWnt3a) at 0 to

1 12 hours after seeding. Line is centred on mean, error bars are SEM.  $n = 3$ ,  $N \geq 40$  cells per  
2 timepoint and per  $n$ . Stars in box (*right*) indicate statistical significance to WT with Wnt3a-  
3 beads, calculated by two-way ANOVA with Tukey multiple comparison test, as follows: ns  
4 (*non-significant*,  $p > 0.05$ ),  $*p < 0.05$ ,  $**p < 0.01$ ,  $***p < 0.001$ ,  $****p < 0.0001$ .

5 **C.** Graphical representation of the bead retention time in WT ESCs, Wnt pathway KO ESCs,  
6 or WT ESCs treated with 10  $\mu\text{M}$  CNQX, contacting Wnt3a-beads or WT ESCs contacting  
7 iWnt3a-beads.  $N \geq 46$  cells/condition are presented as columns. Grey colour indicates cell  
8 without beads, Blue colour indicates cell with beads. Time is displayed in the y axis,  
9 expressed in minutes.

10 **D.** Quantification of the Wnt-bead retention time for cells displayed in **C**. Box indicates  
11 median and quartiles, error bars indicate 10-90 percentile, dots are data out of range. Data is  
12 pooled approximately evenly from  $n \geq 3$  independent experiments, total  $N \geq 46$   
13 cells/condition. Stars indicate statistical significance to WT ESCs contacting Wnt3a-beads,  
14 calculated by two-way ANOVA with Tukey multiple comparison tests, as follows:  $**p < 0.01$ ,  
15  $***p < 0.001$ ,  $****p < 0.0001$ .

16

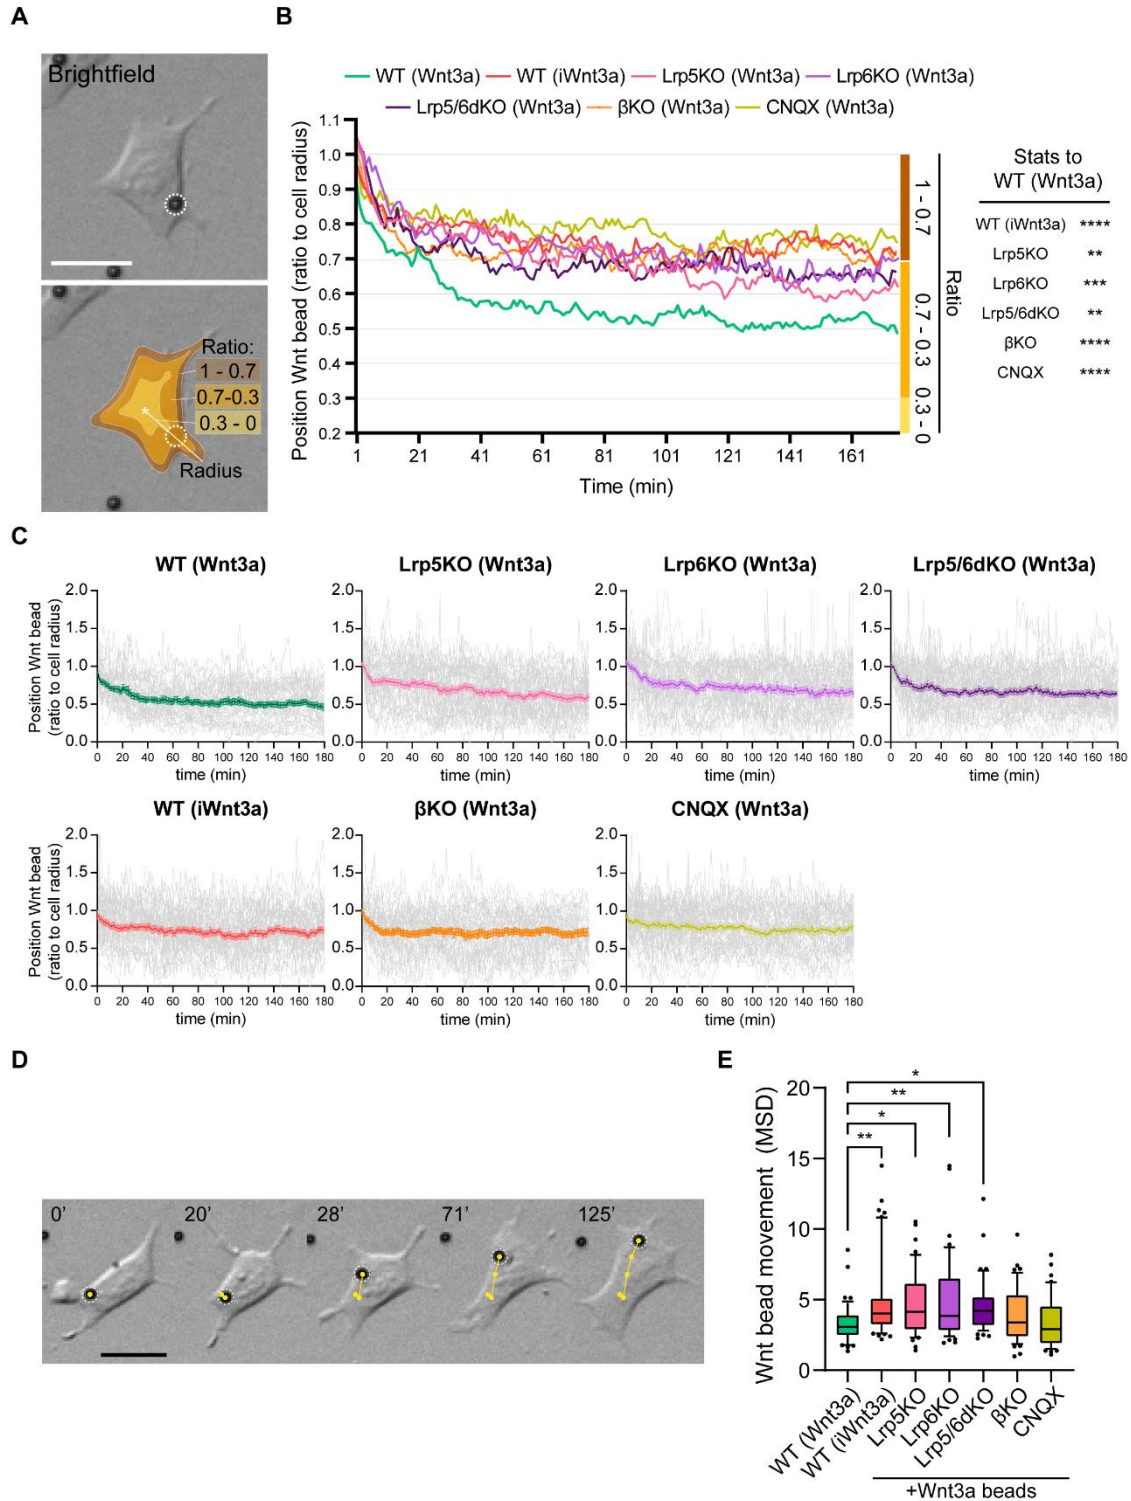

1

2 **FIGURE 3. Wnt co-receptors and iGluR control Wnt-bead movement and positioning**  
3 **at the membrane**

4 **A.** Representative brightfield image of an ESC contacting a Wnt3a-bead (*top*). Schematic  
5 representation of “membrane” area (1-0.7 ratio of radius, brown), “middle of cell” area (0.7-



1 0.3 ratio of radius, orange) or “top of cell” area (0.3-0 ratio of radius, yellow), and of the  
2 radius used to calculate the areas (white line) (*bottom*). Scale bar, 20  $\mu\text{m}$ .

3 **B.** Quantification of Wnt-bead position in the cell, displayed as ratio to cell radius, and  
4 measured every minute for 3 hours (180 minutes) after initial Wnt-bead recruitment. Lines  
5 are mean per condition. *Right* axis indicates cellular areas, as described in **A**.  $N \geq 47$  total  
6 cells/condition, pooled approximately evenly from  $n \geq 3$  experiments. Stars indicate statistical  
7 significance across time average to WT ESCs contacting Wnt3a-beads, calculated by one-  
8 way ANOVA with Tukey multiple comparison test, as follows:  $**p < 0.01$ ,  $***p < 0.001$ ,  $****p$   
9  $< 0.0001$ .

10 **C.** Quantification of Wnt-bead position in the cell, displayed as ratio to cell radius, and  
11 measured every minute for 3 hours (180 minutes) after initial Wnt-bead recruitment, as  
12 summarised in **B**. Coloured lines are mean, grey lines are individual cell tracks, error bars =  
13 SEM.  $N \geq 47$  total cells/condition, pooled approximately evenly from  $n \geq 3$  experiments.

14 **D.** Representative frames of time-course live imaging, displaying an ESC contacting a Wnt  
15 bead. Wnt-bead is highlighted with white dashed circle. Yellow track indicates Wnt-beads  
16 movement on the cell over time. Scale bar, 20  $\mu\text{m}$ . Time is minutes.

17 **E.** Quantification of Wnt-bead movement on the cell, presented as MSD. Bead movement  
18 was measured every minute for 3h (180 min) after recruitment in WT ESCs contacting  
19 Wnt3a- or iWnt3a-beads, in Wnt pathway KO ESCs contacting Wnt3a-beads or in WT ESCs  
20 treated with 10  $\mu\text{M}$  CNQX contacting Wnt3a-beads. Box indicates median and quartiles,  
21 error bars indicate 10-90 percentile, dots are data outside 10-90 percentile range.  $N \geq 46$   
22 total cells/condition, pooled approximately evenly from  $n \geq 3$  experiments. Stars indicate  
23 statistical significance calculated by one-way ANOVA with Tukey multiple comparison, as  
24 follows:  $*p < 0.05$ ,  $**p < 0.01$ .

25

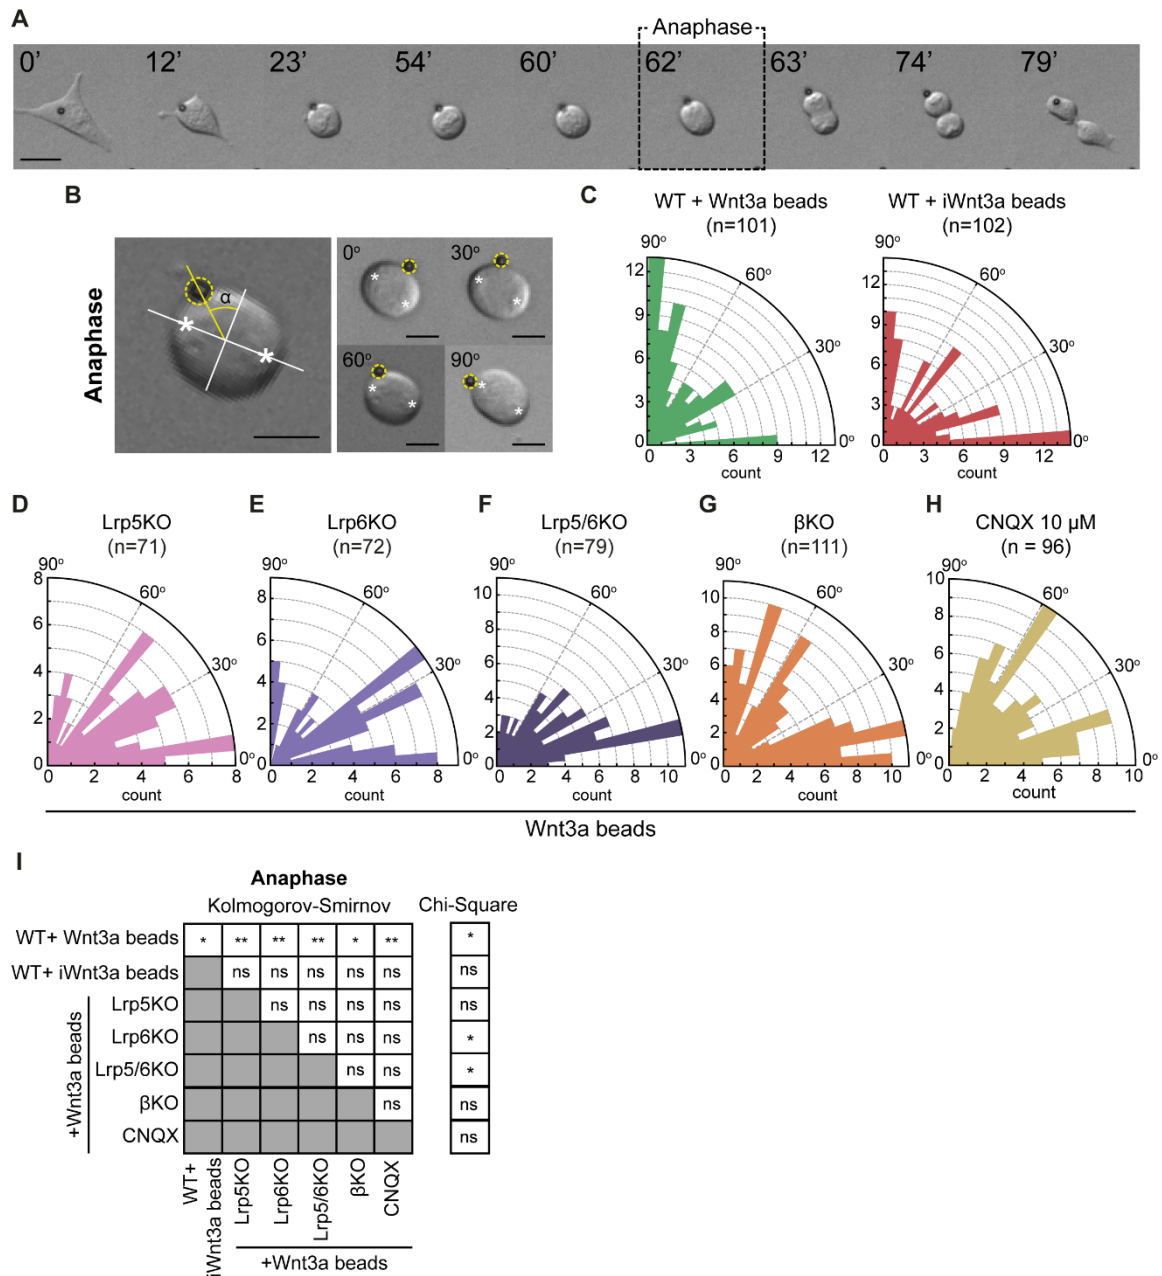

1

2 **FIGURE 4. Wnt/β-catenin pathway and iGluR activity regulate the orientation of the**  
 3 **mitotic spindle**

4 **A.** Representative frames of a time-course live imaging, displaying an ESCs contacting a  
 5 Wnt-bead and undergoing an oriented division. Wnt-bead is black sphere. Scale bar, 20 μm.  
 6 Time is minutes. Dashed box indicates the “Anaphase” timepoint used for spindle orientation  
 7 analysis.

8 **B.** (Left) Representative image of the method used for spindle angle measurement relative  
 9 to Wnt-bead position. Asterisks indicate cell poles used as reference for the measurement.  
 10 Orthogonal white lines depict major and minor axis, yellow line points to Wnt-bead and limits  
 11 the angle measured (α). Wnt-bead is highlighted with yellow dashed circle. (Right)

- 1 Representative images of ESCs dividing with Wnt-beads at different angles (indicated in the  
2 figure). Scale bars, 10  $\mu$ m.
- 3 **C.** Rose-plots depicting the spindle angle at anaphase relative to Wnt-bead in WT ESCs  
4 contacting Wnt3a-beads (*left*, green) or iWnt3a-beads (*right*, red). Number of cells (n) is  
5 displayed in the figure, pooled approximately evenly from  $n \geq 3$  experiments.
- 6 **D – H.** Rose-plots depicting the spindle angle at anaphase in Lrp5KO (**D**, pink), Lrp6KO (**E**,  
7 purple), Lrp5/6dKO (**F**, dark purple),  $\beta$ KO (**G**, orange) contacting Wnt3a-beads or WT ESCs  
8 treated with 10  $\mu$ M CNQX contacting Wnt3a-beads (**H**, yellow). Number of cells (n) is  
9 displayed in the figure, pooled approximately evenly from  $n \geq 3$  experiments.
- 10 **I.** Statistical comparison of spindle angles between all conditions, at anaphase. (*Left*)  
11 Kolmogorov-Smirnov comparison of angle distribution between conditions. (*Right*) Chi-  
12 squared comparison of the angles of each condition to a random ( $n/3$ :  $n/3$ :  $n/3$  for  $0^\circ$ - $30^\circ$ :  
13  $30^\circ$ - $60^\circ$ :  $60^\circ$ - $90^\circ$ ) distribution. Stars indicate statistical significance, as follows: ns (*non-*  
14 *significant*,  $p > 0.05$ ), \* $p < 0.05$ , \*\* $p < 0.01$ .

15

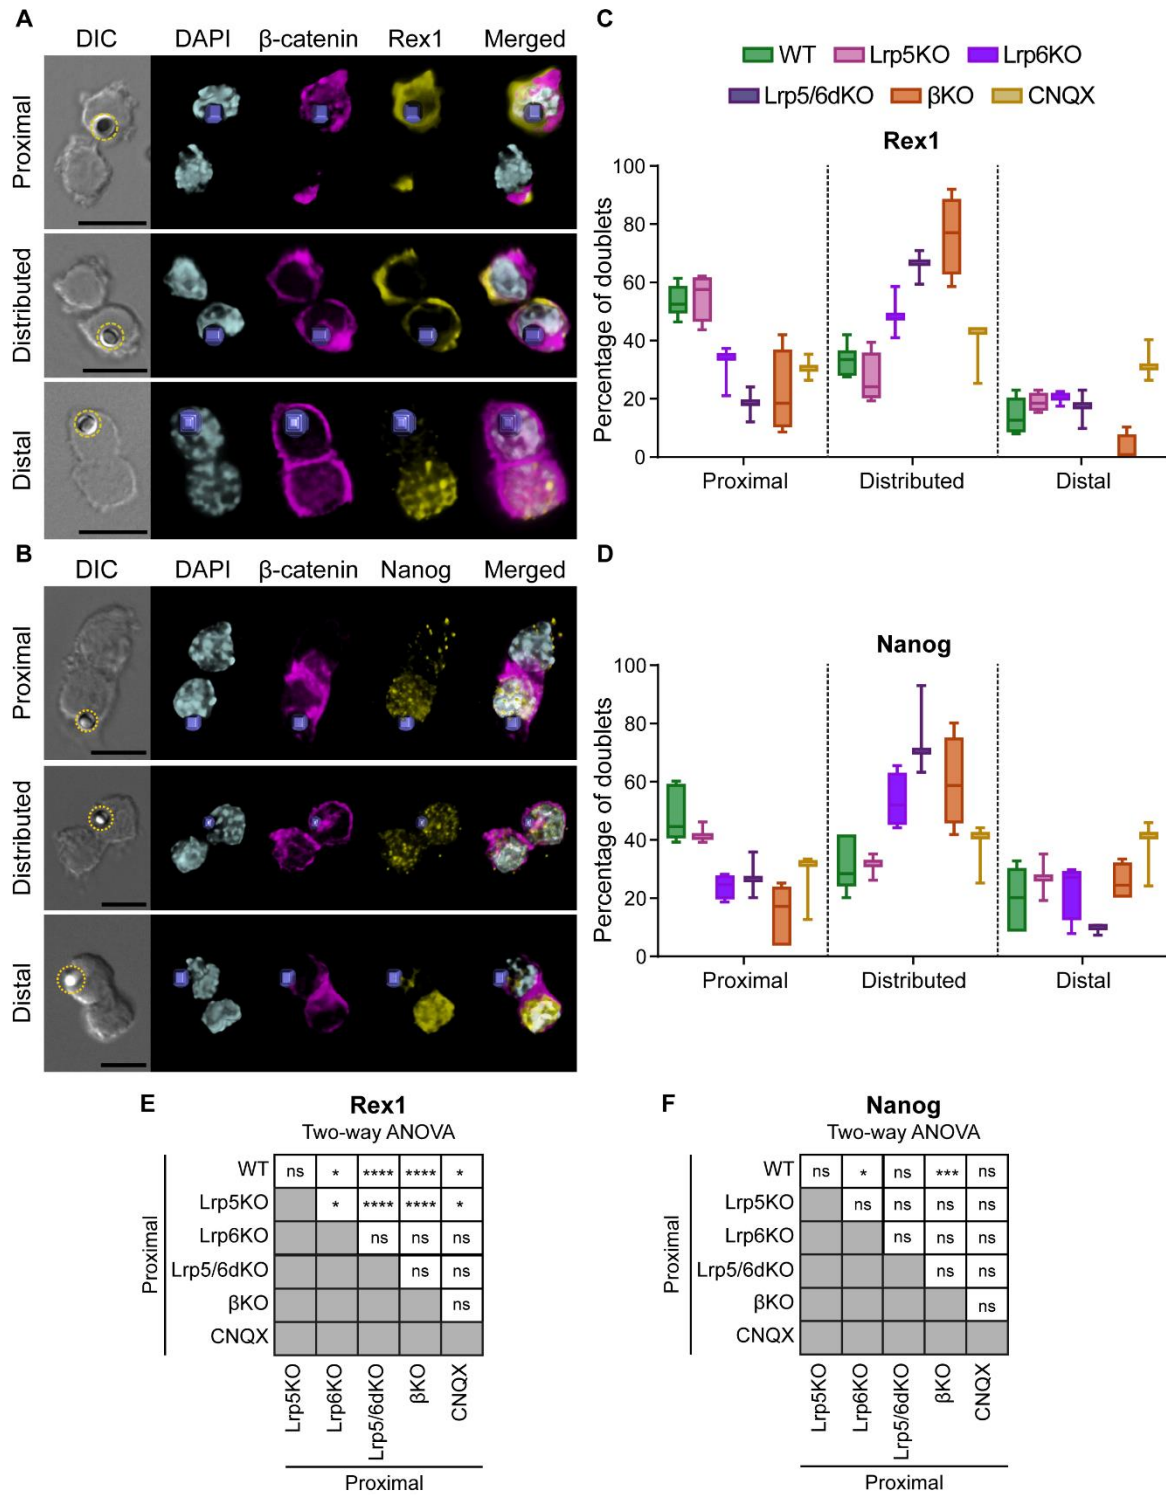

1

2 **FIGURE 5. β-catenin and Lrp6 and iGluR activity are required for Wnt-mediated**  
 3 **asymmetric cellular division**

4 **A and B.** Representative images of ESC doublets after dividing in contact with a Wnt3a-  
 5 bead, labelled with antibodies against β-catenin (magenta), Rex1 (**A**, yellow), Nanog (**B**,  
 6 yellow) or 4',6-diamidino-2-phenylindole (DAPI, cyan). Images are 3D renderings of  
 7 mathematically deconvolved raw fluorescent images. DIC is Differential Interference

1 Contrast. Panels display doublets with higher marker expression in the Wnt-bead contacting  
2 cell (*Top*, Proximal), with distributed levels of expression between cells (*Middle*, Distributed)  
3 or with higher marker expression in the cell not contacting a Wnt-bead (*Bottom*, Distal). Wnt-  
4 bead is highlighted by yellow dashed circle in DIC or reconstructed as purple box in  
5 fluorescence images. Scale bars are 20  $\mu\text{m}$ .

6 **C and D.** Quantification of the percentage of doublets displaying Proximal, Distributed or  
7 Distal Rex1 (**C**) or Nanog (**D**) distribution.  $n \geq 3$ , each with  $N \geq 7$  doublets. Box indicates  
8 median and quartiles, error bars indicate 10-90 percentile.

9 **E and F.** Statistical comparison of proximally dividing cells amongst conditions, calculated by  
10 two-way ANOVA with Tukey multiple comparison test. Stars indicate statistical significance  
11 as follows: ns (*non-significant*,  $p > 0.05$ ),  $*p < 0.05$ ,  $**p < 0.01$ .,  $***p < 0.001$ ,  $****p < 0.0001$ .

12

13

14

1    **CAPTIONS FOR SUPPLEMENTARY MOVIES**

2    **Movie 1. Protrusions of WT ESCs.** High-quality phase images of WT ESCs generating  
3    protrusions. Images were obtained by 3D holotomographic microscopy. Scale bar, 20  $\mu\text{m}$ .

4    **Movie 2. Protrusions of Lrp5KO ESCs.** High-quality phase images of Lrp5KO ESCs  
5    generating protrusions. Images were obtained by 3D holotomographic microscopy. Scale  
6    bar, 20  $\mu\text{m}$ .

7    **Movie 3. Protrusions of Lrp6KO ESCs.** High-quality phase images of Lrp6KO ESCs  
8    generating protrusions. Images were obtained by 3D holotomographic microscopy. Scale  
9    bar, 20  $\mu\text{m}$ .

10   **Movie 4. Protrusions of Lrp5/6dKO ESCs.** High-quality phase images of Lrp5/6dKO ESCs  
11   generating protrusions. Images were obtained by 3D holotomographic microscopy. Scale  
12   bar, 20  $\mu\text{m}$ .

13   **Movie 5. Protrusions of  $\beta$ KO ESCs.** High-quality phase images of  $\beta$ KO ESCs generating  
14   protrusions. Images were obtained by 3D holotomographic microscopy. Scale bar, 20  $\mu\text{m}$ .

15

16

17
